# Supplementary material for: Bacterial protein domains with a novel Ig‐like fold target human CEACAM receptors
Source: PubMed Central journal article supplement (PMC8013792; doi:10.15252/embj.2020106103), 2021-02-01

**STAIN**

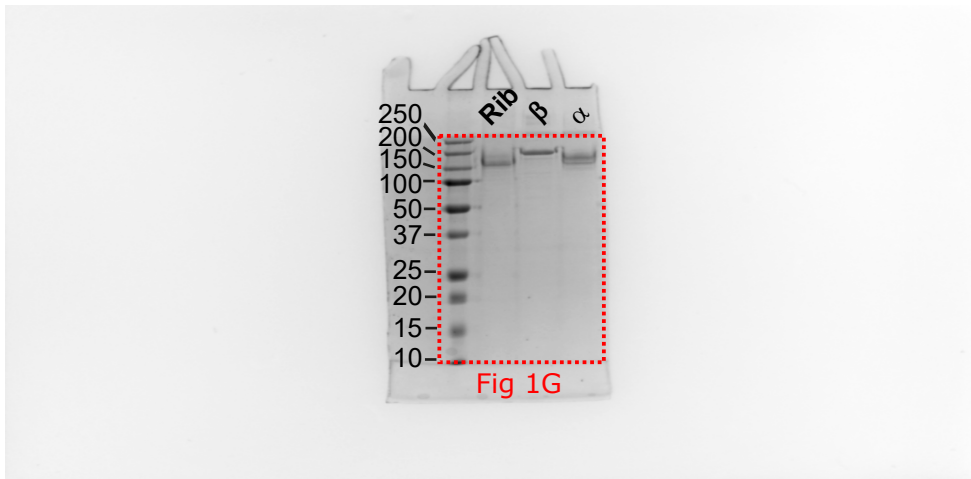

**BLOT**

**PHOTOGRAPH**

**CHEMILUMINESCENCE**

rCEACAM1-His

Control

rCEACAM1-His

Control

Rib  $\beta$   $\alpha$

Rib  $\beta$   $\alpha$

Rib  $\beta$   $\alpha$

Rib  $\beta$   $\alpha$

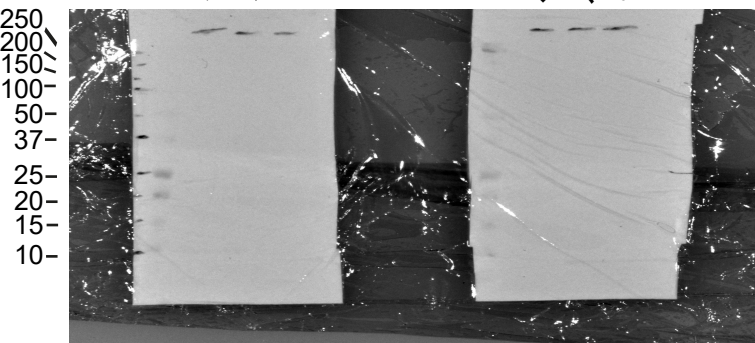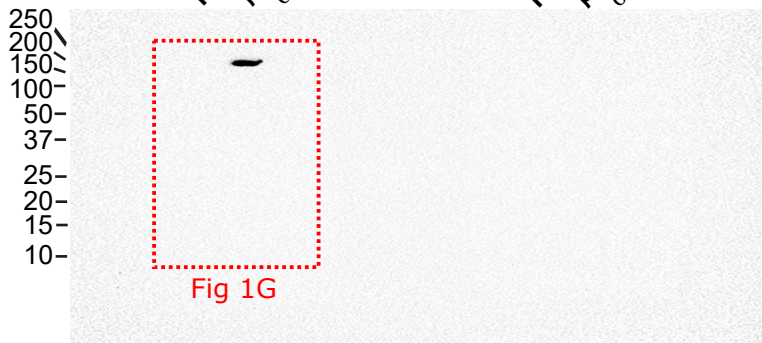

Supplement: EMBJ-40-e106103-s001.pdf [file EMBJ-40-e106103-s001.pdf]
