# Supplementary material for: Bacterial protein domains with a novel Ig‐like fold target human CEACAM receptors
Source: PubMed Central journal article supplement (PMC8013792; doi:10.15252/embj.2020106103), 2021-02-01
Supplement: EMBJ-40-e106103-s002.pdf [file EMBJ-40-e106103-s002.pdf]

## Expanded View Figures

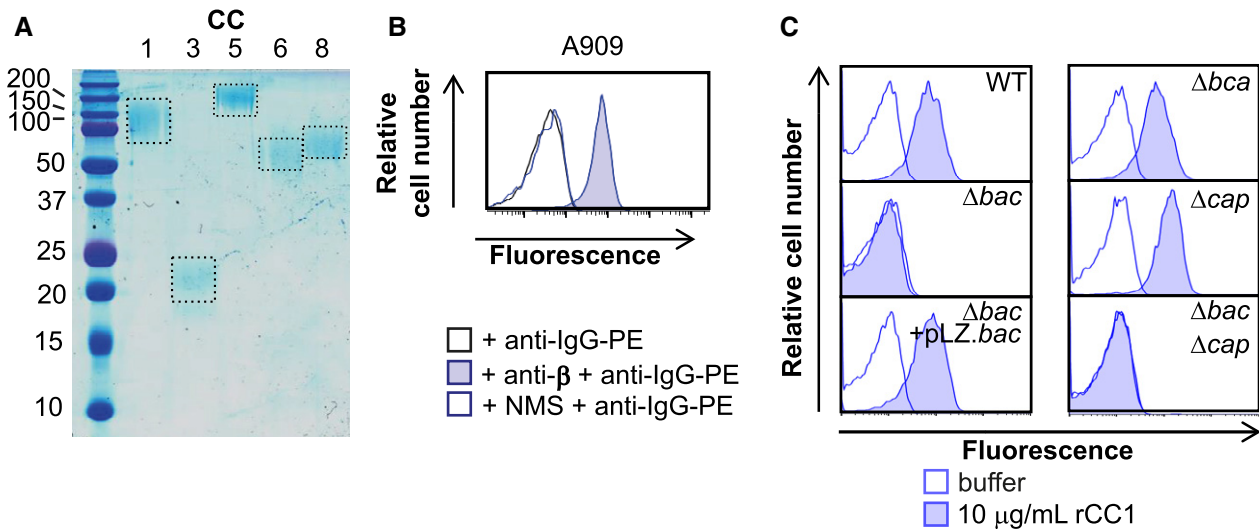

**Figure EV1. GBS binds CEACAM1 receptor through  $\beta$  protein.**

- A Expression and purification of 6xHis tagged recombinant (r)CEACAM1 (CC1), CEACAM3 (CC3), CEACAM5 (CC5), CEACAM6 (CC6) and CEACAM8 (CC8) from a eukaryotic expression system. Dotted boxes signal proteins of expected size.
- B Mouse anti- $\beta$  serum, but not normal mouse serum (NMS), detected expression of  $\beta$  protein in wild-type A909 strain.
- C Binding of rCC1 (10  $\mu\text{g}/\text{ml}$ ) to GBS strain A909 was mediated via the *bac* gene, as demonstrated by comparison of CC1 binding to wild type,  $\Delta bac$  and complemented strains ( $\Delta bac$  + pLZ.*bac*). Mutation of genes encoding other surface proteins ( $\alpha$  protein encoded by *bca*) or surface structures (capsule encoded by *cap*) did not impact rCC1 binding. Data representative of  $n = 3$  replicates.

Data information: Fluorescence of bacteria in (B and C) was measured by flow cytometry.

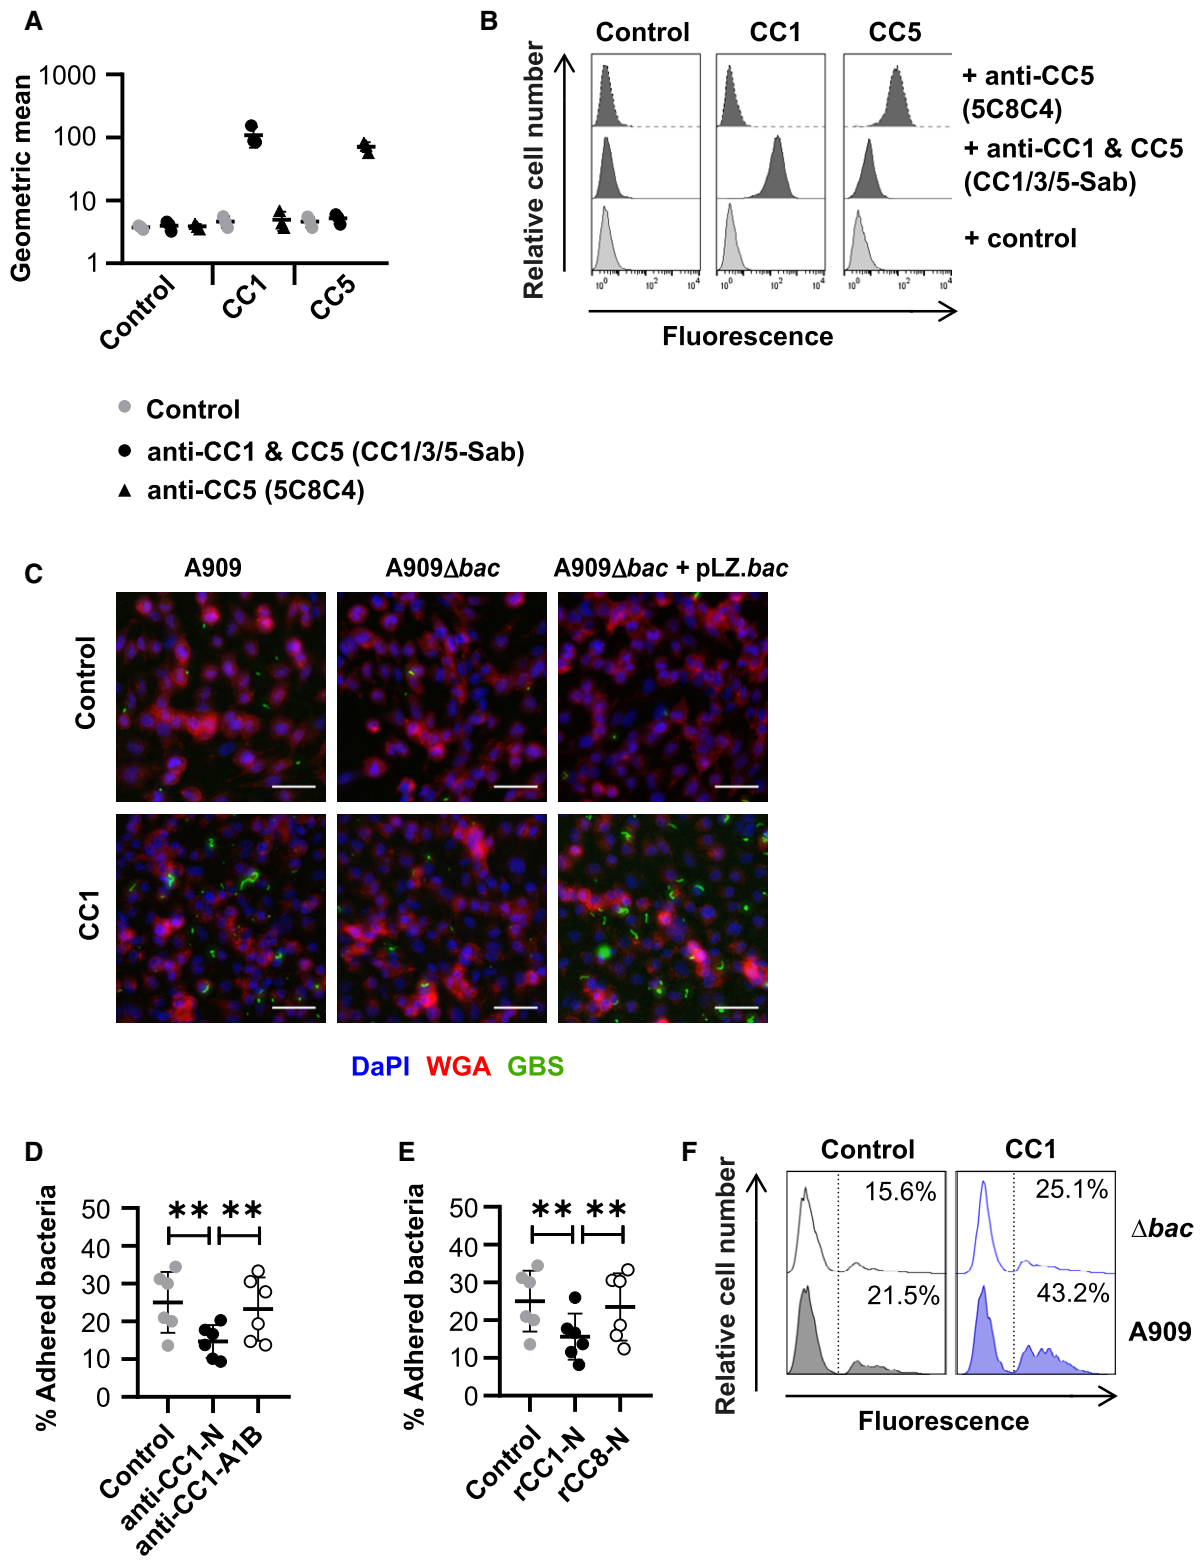

Figure EV2.

**Figure EV2. GBS exploit CEACAM1 for colonisation of epithelial cells.**

- A, B Expression of human CEACAM1 (CC1) and CEACAM5 (CC5) on detached CHO cell lines, as measured by flow cytometry. CC1/3/5-Sab mAb recognises the N-terminal domain of CC1, CC3 and CC5, whilst 5C8C4 mAb recognises CC5. Mean and standard deviation of data from  $n = 3$  replicates is shown in (A), and representative flow cytometry plots are shown in (B).
- C Widefield microscopy imaging of FITC-labelled GBS A909,  $\Delta bac$  or  $\Delta bac + pLZ.bac$  strain adhesion to human CC1-expressing or empty vector control CHO transfectants. Cell membranes were stained with AF-647 conjugated wheat germ agglutinin (WGA) (red) and nuclei with DAPI (blue). Scale bars represent 40  $\mu\text{m}$ .
- D Adhesion of GBS A909 to CC1 expressing CHO cells was inhibited by pre-incubating cells with anti-CC1-N (clone CC1/3/5-Sab) mAb but not anti-CC1-A1B (clone B3-17) mAb. Data were analysed by repeated one-way ANOVA with Sidak's multiple comparisons.  $**P < 0.01$ . Mean and SD values are reported for  $n = 6$  independent experiments.
- E Adhesion of GBS A909 to CC1 expressing CHO cells was inhibited by pre-incubating bacteria with 30  $\mu\text{g/ml}$  rCC1-N but not rCEACAM8 (CC8)-N. Data were analysed by repeated one-way ANOVA with Sidak's multiple comparisons.  $**P < 0.01$ . Mean and SD values are reported for  $n = 6$  independent experiments.
- F Adhesion of FITC-labelled A909 strains to human CC1-expressing or control CHO transfectants at an MOI of 10. Cell lines were detached and then incubated with FITC-labelled A909 strains for 30 min at 4°C. Fluorescence of cells was measured by flow cytometry analysis.

Data information: Fluorescence of cells in (A, B and F) was measured by flow cytometry. The number of adhered bacteria to cell monolayers in (D and E) was quantified by growth on Todd-Hewitt agar and enumeration of colony forming units (CFU).

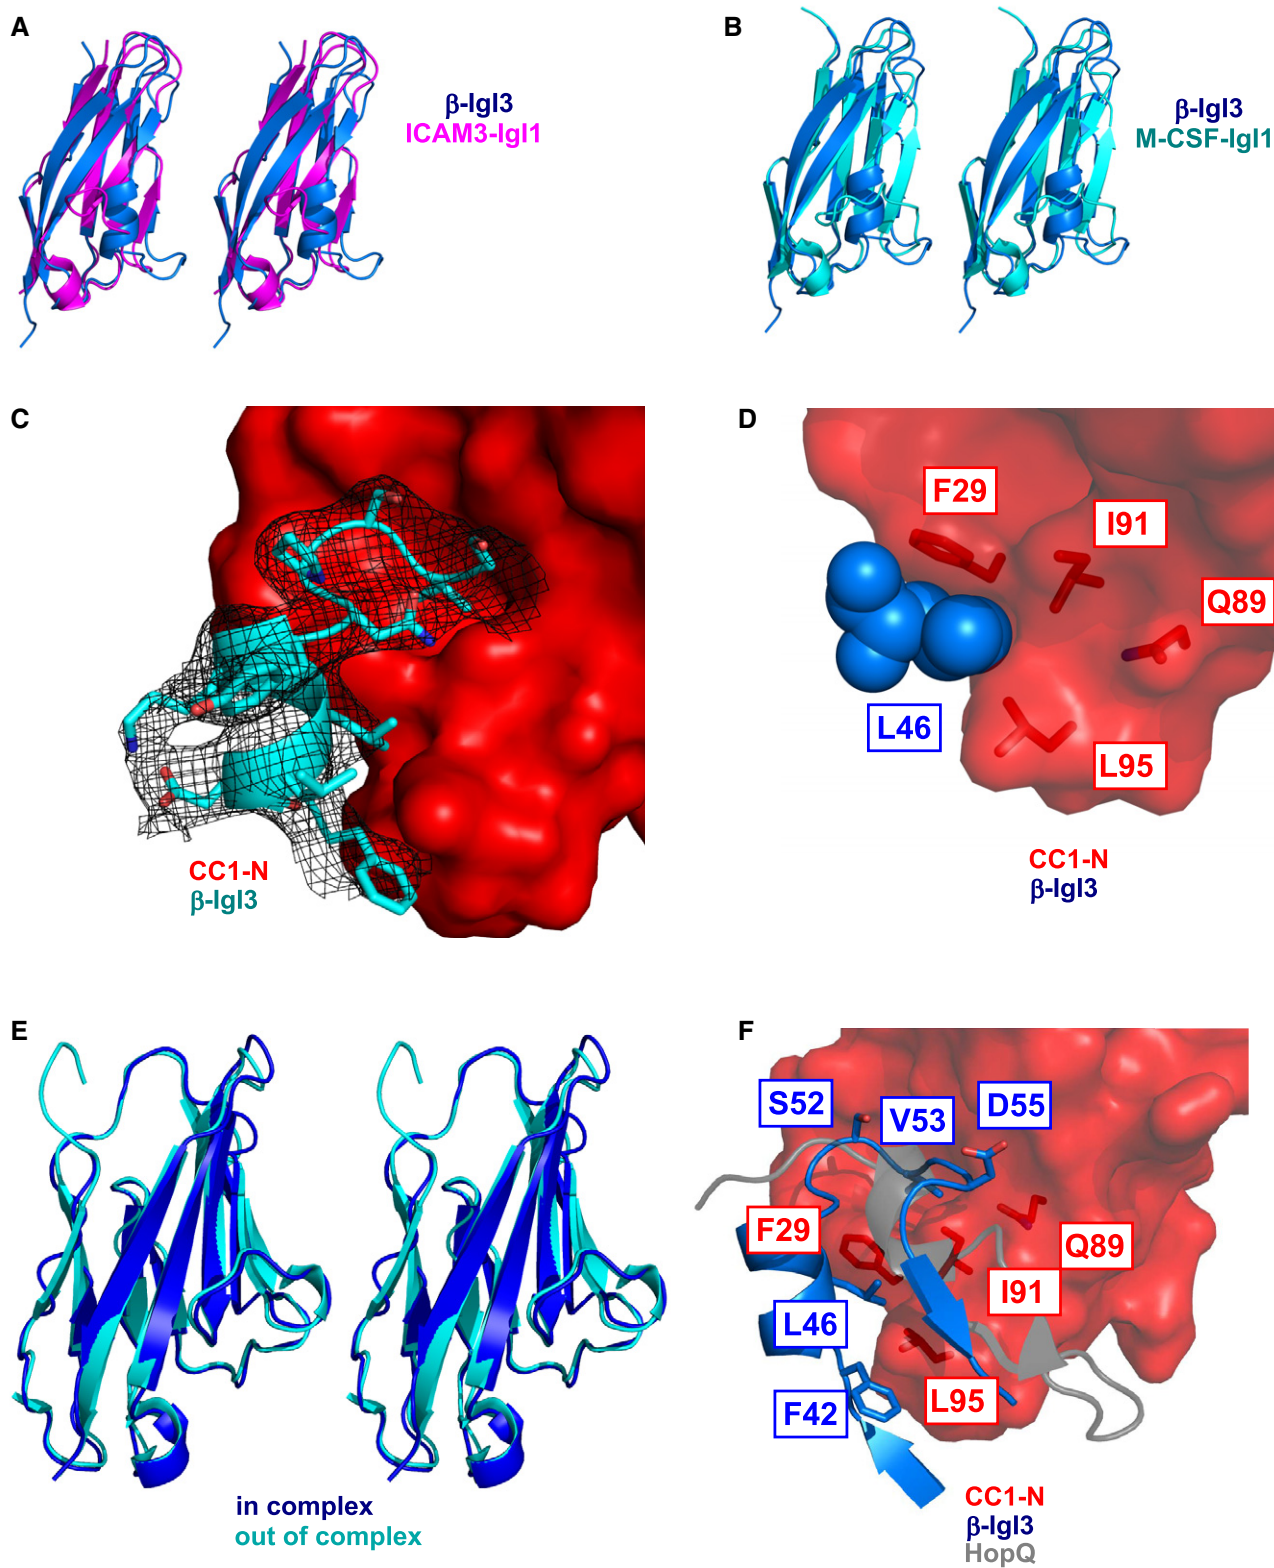

Figure EV3.

**Figure EV3. Crystal structure of (β-IgI3)-(CEACAM1) interface.**

- A Superposition of β-IgI3 (cyan) with that of IgI1 domain of ICAM3, shown in stereo view.
- B Superposition of β-IgI3 (cyan) with that of IgI1 domain of M-CSF, shown in stereo view.
- C An electron density map showing β-IgI3 bound to CC1-N.
- D Focus of the critical β-IgI3 residue L46 and interacting residues in CEACAM1 (CC1)-N. A r.m.s.d. of 0.74 Å is observed.
- E Superposition of CC1-N (pdb 2gk2, cyan) with that of CC1-N in complex with β-IgI3 (blue). A r.m.s.d. of 0.74 Å is observed.
- F Superposition of the β-IgI3 and CEACAM1 (CC1)-N complex (blue and red, respectively) and HopQ and CC1-N complex (grey and red, respectively).

**Figure EV4. Isothermal Titration Calorimetry (ITC) binding curves.**

- A, B (A) rCEACAM1 (CC1)-N domain and β-IgI3 mutants, and (B) rCC1-N domain mutants and β-IgI3. ITC binding curves for wild-type β-IgI3 (formally called β-IgSF) and wild-type rCC1-N are duplicated from Fig 3A for ease of comparison. Experiments were performed using an iTC200 instrument (GE Healthcare), at 25°C with 16 injections of 2.42 μl aliquots. All data were analysed using Origin 7.0 software.

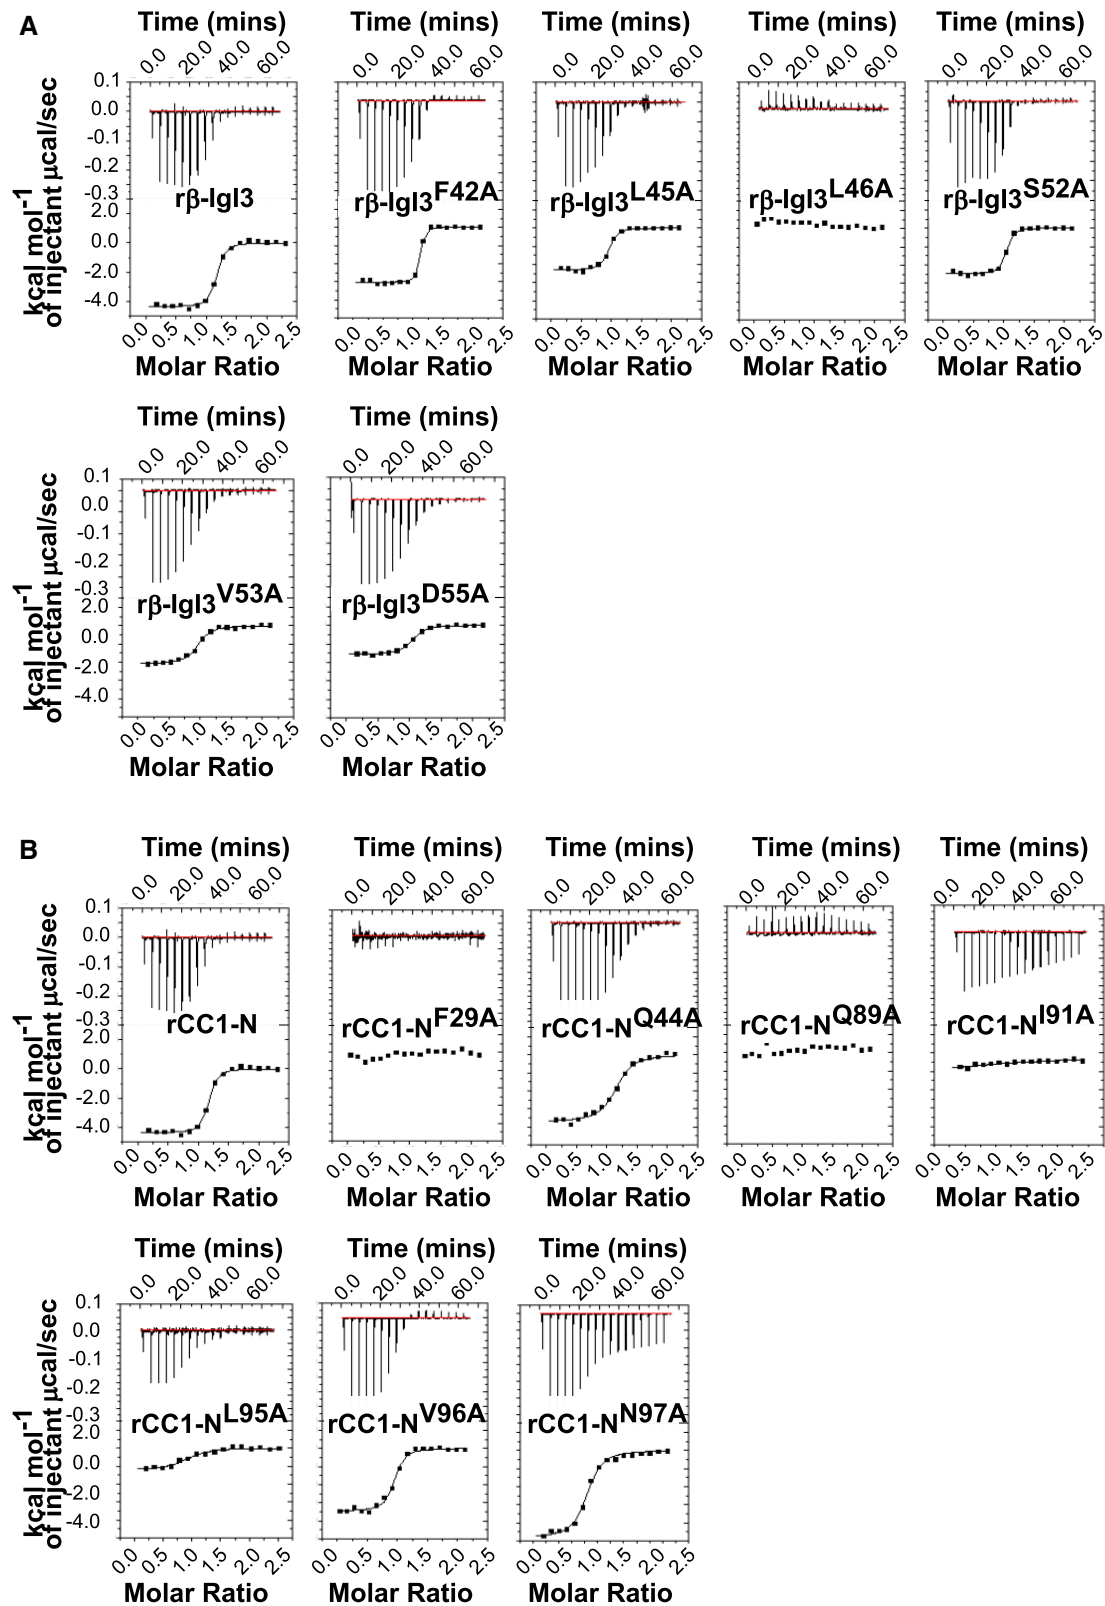

Figure EV4.

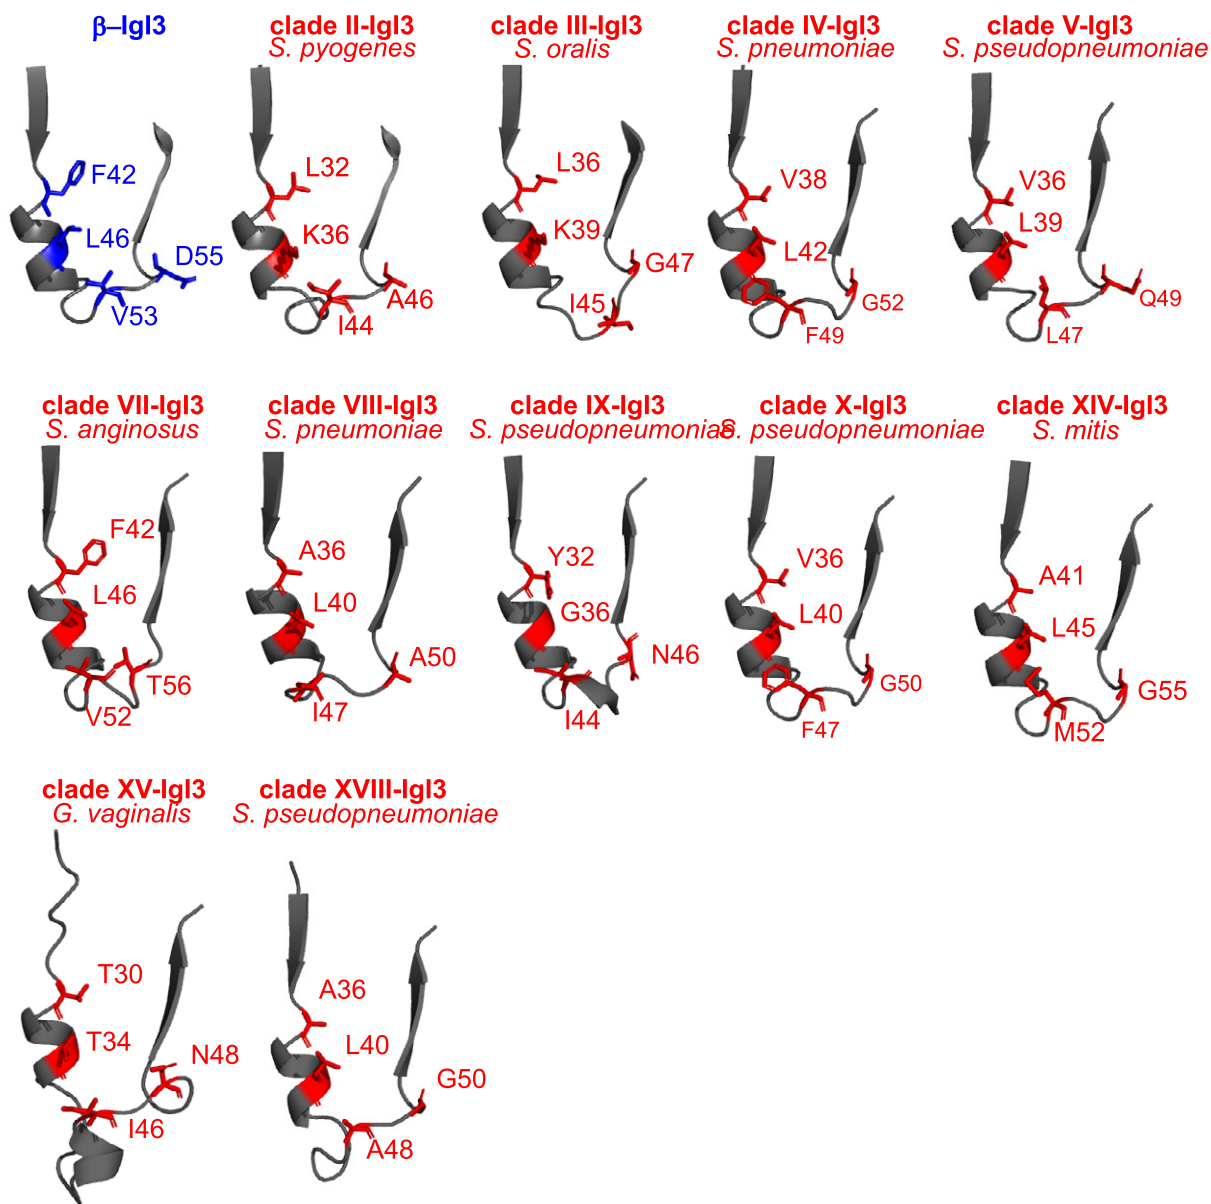

**Figure EV5. Residues in  $\beta$ -IgI3 required for binding CEACAM1 are not conserved in IgI3 homologs.**

Close-up of the C strand,  $\alpha$ -helix and D strand of  $\beta$ -IgI3 and IgI3 homologs, indicating the amino acids present at residue sites in  $\beta$ -IgI3 that bind CEACAM1 (CC1). The clade and bacterial species of the sequence in each model is shown.
