# Supplementary material for: Bacterial protein domains with a novel Ig‐like fold target human CEACAM receptors
Source: PubMed Central journal article supplement (PMC8013792; doi:10.15252/embj.2020106103), 2021-02-01

STAIN

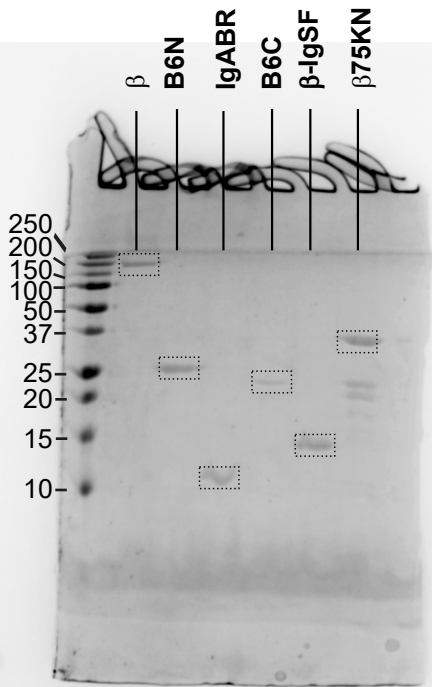

Supplement: EMBJ-40-e106103-s003.pdf [file EMBJ-40-e106103-s003.pdf]
