# Supplementary material for: Bacterial protein domains with a novel Ig‐like fold target human CEACAM receptors
Source: PubMed Central journal article supplement (PMC8013792; doi:10.15252/embj.2020106103), 2021-02-01
Supplement: EMBJ-40-e106103-s005.pdf [file EMBJ-40-e106103-s005.pdf]

## Table of Contents

1. **Appendix Figure S1:** CEACAM1 does not bind to *S. sanguinis*.
2. **Appendix Figure S2:** The N-terminal domain of CEACAM1 binds  $\beta$ -IgSF.
3. **Appendix Figure S3:** Binding of CEACAMs to GBS.
4. **Appendix Figure S4:** Alignment of Igl3 domain sequences from  $\beta$  protein of GBS
5. **Appendix Figure S5:** Predicted structures of Igl3 homologs.
6. **Appendix Figure S6:** Igl3 domains bind CEACAM1 through alternative binding pockets.
7. **Appendix Figure S7:** Isothermal titration calorimetry (ITC) binding curve of CEACAM1-N and R28-Igl3.
8. **Appendix Table S1.** Bacterial strains used in this study.
9. **Appendix Table S2:** Expression vectors constructs.
10. **Appendix Table S3:** Isothermal Titration Calorimetry (ITC) binding curves constants and thermodynamic parameters for CEACAM-N and  $\beta$ -IgSF interactions.
11. **Appendix Table S4.** Data collection and refinement statistics for  $\beta$ -Igl3 and CEACAM1 (CC1)-N.
12. **Appendix Table S5.** Contact sites in ( $\beta$ -Igl3)(CEACAM1-N) complex.
13. **Appendix Table S6:** Isothermal Titration Calorimetry (ITC) binding curves constants and thermodynamic parameters for CEACAM1 (CC1)-N and  $\beta$ -Igl3 mutants.
14. **Appendix Table S7:** Cell lines used in this study.
15. **Appendix Table S8:** Antibodies used in this study.

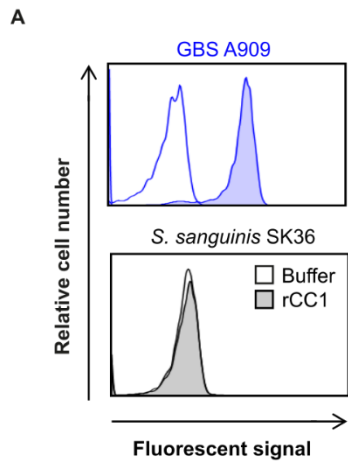

**Appendix Figure S1: CEACAM1 does not bind to *S. sanguinis*.** Binding of rCEACAM1-His (rCC1) (10  $\mu\text{g}/\text{mL}$ ) to GBS strain A909 and *S. sanguinis* strain SK36. Fluorescence of bacteria was measured by flow cytometry. Data representative of  $n = 3$ .

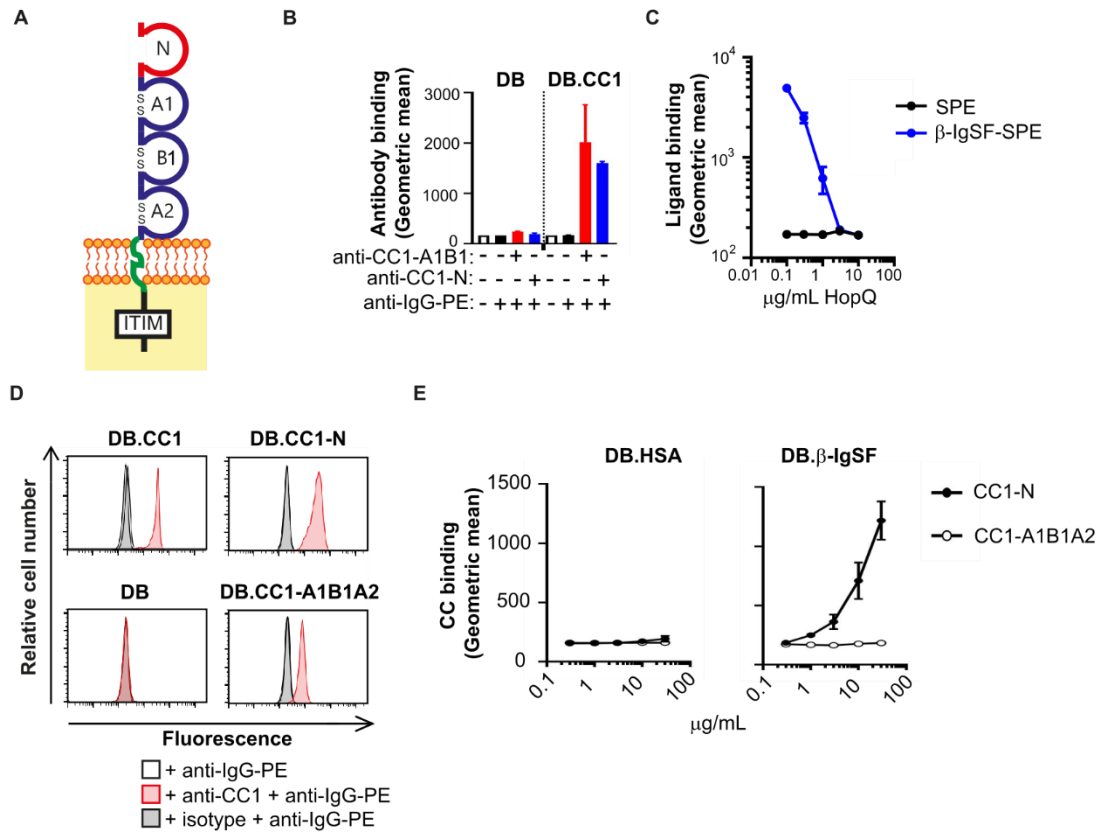

**Appendix Figure S2: The N-terminal domain of CEACAM1 binds  $\beta$ -IgSF.** **A)** Schematic of CEACAM1-4L (CC1) structure. The extracellular region of the receptor is composed of the N terminal (IgV-like) domain, and the A1, B1 and A2 (IgC2) domains. The cytoplasmic tail of full length CEACAM1 contain immunoreceptor tyrosine-based inhibitory motifs (ITIM) for signalling. **B)** Control showing binding of anti-CC1-N or anti-CC1-A1B1 mAb (5  $\mu$ g/mL) to dynabeads (DB) coated with CC1 or buffer. Mean and SD values are reported for  $n = 3$ . **C)** rHopQ inhibits binding of  $\beta$ -IgSF tetramers (3  $\mu$ g/mL) to DB.CC1. **D)** Control showing binding of anti-CC1 mAb to DB coated with rCC1, rCC1-N and rCC1-A1B1A2 but not to controls. Data representative of  $n = 3$ . **E)** rCC1-N but not rCC1-A1B1A2 binds to  $\beta$ -IgSF-, but not HSA-, coated DB in a concentration-dependent manner. Mean and SD values are reported for  $n = 3$ . Fluorescence of DB in B, C, D and E was measured by flow cytometry. Note: error bars in controls are smaller than symbols.

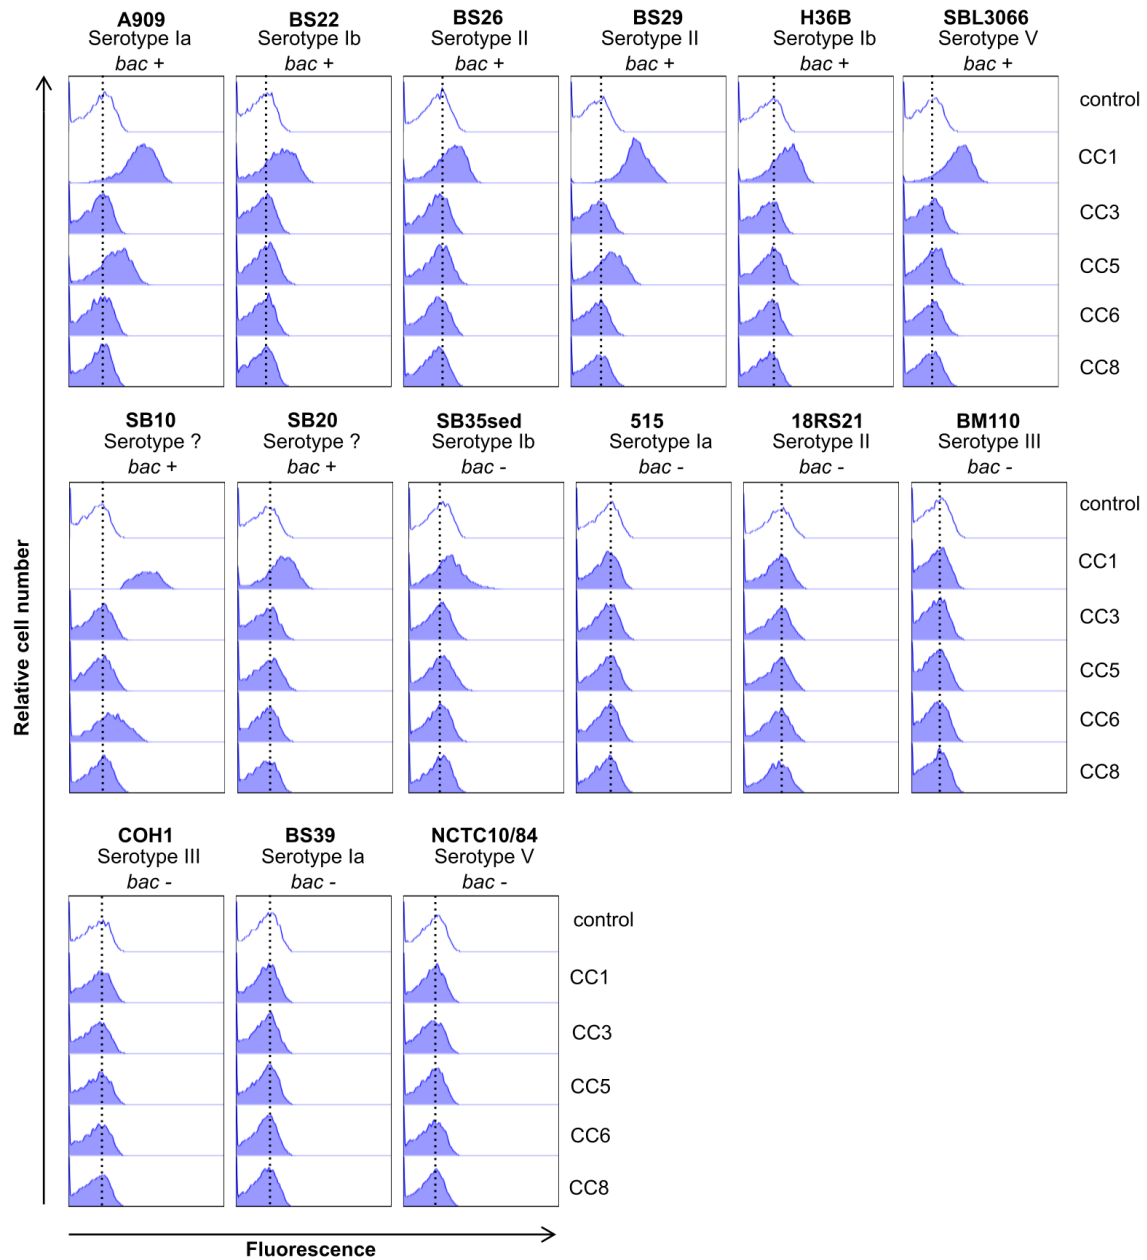

**Appendix Figure S3: Binding of CEACAMs to GBS.** Binding rCEACAM1-His (CC1), rCEACAM3-His (CC3), rCEACAM5-His (CC5), rCEACAM6-His (CC6) and rCEACAM8-His (CC8) (10  $\mu\text{g}/\text{mL}$ ) to a panel of GBS strains. Serotype and carriage of *bac* gene is indicated for each strain. Data representative of  $n = 3$ . Fluorescence of bacteria was measured by flow cytometry.

|                             | 10       | 20         | 30        | 40          |
|-----------------------------|----------|------------|-----------|-------------|
| EPU95478.1:428540/1-113     | ANENNQQK | IELTVSPENI | TVYEGEDVK | FTV TAKSDSK |
| WP_000295505.1:94206/1-113  | ANENNQQK | IELTVSPENI | TVYEGEDVK | FTV TAKSDSK |
| KXA56917.1:93205/1-113      | ANENNQQK | IELTVSPENI | TVYEGEDVK | FTV TAKSDSK |
| WP_000477137.1:428540/1-113 | ANENNQQK | IELTVSPENI | TVYEGEDVK | FTV TAKSDSK |
| WP_017650912.1:428540/1-113 | ANENNQQK | IELTVSPENI | TVYEGEDVK | FTV TAKSDSK |
| WP_132935284.1:428540/1-113 | ANENNQQK | IELTVSPENI | TVYEGEDVK | FTV TAKSDSK |
| WP_001933343.1:428540/1-113 | ANENNQQK | IELTVSPENI | TVYEGEDVK | FTV TAKSDSK |
| WP_025195781.1:428540/1-113 | ANENNQQK | IELTVSPENI | TVYEGEDVK | FTV TAKSDSK |
| WP_132868240.1:428540/1-113 | ANENNQQK | IELTVSPENI | TVYEGEDVK | FTV TAKSDSK |
| WP_041980967.1:428540/1-113 | ANENNQQK | IELTVSPENI | TVYEGEDVK | FTV TAKSDSK |
| CFQ92576.1:130/1-113        | ANENNQQK | IELTVSPENI | TVYEGEDVK | FTV TAKSDSK |
| EPV41091.1:160272/1-113     | ANENNQQK | IELTVSPENI | TVYEGEDVK | FTV TAKSDSK |
| WP_049458979.1:428540/1-113 | ANENNQQK | IELTVSPENI | TVYEGEDVK | FTV TAKSDSK |
| SQA16054.1:253365/1-113     | ANENNQQK | IELTVSPENI | TVYEGEDVK | FTV TAKSDSK |
| BAE45252.1:428540/1-113     | ANENNQQK | IELTVSPENI | TVYEGEDVK | FTV TAKSDSK |
| WP_055345127.1:428540/1-113 | ANENNQQK | IELTVSPENI | TVYEGEDVK | FTV TAKSDSK |
| WP_017650863.1:428540/1-113 | ANENNQQK | IELTVSPENI | TVYEGEDVK | FTV TAKSDSK |
| CNE84135.1:307419/1-113     | ANENNQQK | IELTVSPENI | TVYEGEDVK | FTV TAKSDSK |
| WP_060457561.1:428540/1-113 | ANENNQQK | IELTVSPENI | TVYEGEDVK | FTV TAKSDSK |
| WP_060458554.1:428540/1-113 | ANENNQQK | IELTVSPENI | TVYEGEDVK | FTV TAKSDSK |
| WP_000477135.1:428540/1-113 | ANENNQQK | IELTVSPENI | TVYEGEDVK | FTV TAKSDSK |
| WP_121070430.1:428540/1-113 | ANENNQQK | IELTVSPENI | TVYEGEDVK | FTV TAKSDSK |
| P27951.1:428540/1-113       | ANENNQQK | IELTVSPENI | TVYEGEDVK | FTV TAKSDSK |
| WP_047199360.1:428540/1-113 | ANENNQQK | IELTVSPENI | TVYEGEDVK | FTV TAKSDSK |
| WP_017647376.1:428540/1-113 | ANENNQQK | IELTVSPENI | TVYEGEDVK | FTV TAKSDSK |
| WP_141445744.1:401513/1-113 | ANENNQQK | IELTVSPENI | TVYEGEDVK | FTV TAKSDSK |
| WP_050152779.1:428540/1-113 | ANENNQQK | IELTVSPENI | TVYEGEDVK | FTV TAKSDSK |
| WP_000477136.1:428540/1-113 | ANENNQQK | IELTVSPENI | TVYEGEDVK | FTV TAKSDSK |
| EPV99179.1:351463/1-113     | ANENNQQK | IELTVSPENI | TVYEGEDVK | FTV TAKSDSK |
| WP_071150949.1:419531/1-113 | ANENNQQK | IELTVSPENI | TVYEGEDVK | FTV TAKSDSK |
| WP_000477141.1:428540/1-113 | ANENNQQK | IELTVSPENI | TVYEGEDVK | FTV TAKSDSK |
| WP_157140373.1:377489/1-113 | ANENNQQK | IELTVSPENI | TVYEGEDVK | FTV TAKSDSK |
| WP_000477134.1:428540/1-113 | ANENNQQK | IELTVSPENI | TVYEGEDVK | FTV TAKSDSK |
| WP_094754263.1:428540/1-113 | ANENNQQK | IELTVSPENI | TVYEGEDVK | FTV TAKSDSK |
| WP_001905993.1:428540/1-113 | ANENNQQK | IELTVSPENI | TVYEGEDVK | FTV TAKSDSK |
| WP_017645156.1:423535/1-113 | ANENNQQK | IELTVSPENI | TVYEGEDVK | FTV TAKSDSK |
| WP_094969800.1:428540/1-113 | ANENNQQK | IELTVSPENI | TVYEGEDVK | FTV TAKSDSK |
| WP_047211709.1:423535/1-113 | ANENNQQK | IELTVSPENI | TVYEGEDVK | FTV TAKSDSK |
| WP_050198886.1:428540/1-113 | ANENNQQK | IELTVSPENI | TVYEGEDVK | FTV TAKSDSK |
| WP_000477132.1:423535/1-113 | ANENNQQK | IELTVSPENI | TVYEGEDVK | FTV TAKSDSK |
| WP_000477143.1:428540/1-113 | ANENNQQK | IELTVSPENI | TVYEGEDVK | FTV TAKSDSK |
| WP_047198467.1:428540/1-113 | ANENNQQK | IELTVSPENI | TVYEGEDVK | FTV TAKSDSK |
| CAA41384.1:428540/1-113     | ANENNQQK | IELTVSPENI | TVYEGEDVK | FTV TAKSDSK |
| WP_001880680.1:428540/1-113 | ANENNQQK | IELTVSPENI | TVYEGEDVK | FTV TAKSDSK |
| WP_000477140.1:428540/1-113 | ANENNQQK | IELTVSPENI | TVYEGEDVK | FTV TAKSDSK |
| WP_000477139.1:428540/1-113 | ANENNQQK | IELTVSPENI | TVYEGEDVK | FTV TAKSDSK |
| WP_000477138.1:428540/1-113 | ANENNQQK | IELTVSPENI | TVYEGEDVK | FTV TAKSDSK |
| WP_070841624.1:428540/1-113 | ANENNQQK | IELTVSPENI | TVYEGEDVK | FTV TAKSDSK |
| WP_047205529.1:428540/1-113 | ANENNQQK | IELTVSPENI | TVYEGEDVK | FTV TAKSDSK |
| WP_060800989.1:428540/1-113 | ANENNQQK | IELTVSPENI | TVYEGEDVK | FTV TAKSDSK |
| WP_000477144.1:428540/1-113 | ANENNQQK | IELTVSPENI | TVYEGEDVK | FTV TAKSDSK |
| WP_079219395.1:428540/1-113 | ANENNQQK | IELTVSPENI | TVYEGEDVK | FTV TAKSDSK |
| WP_150411773.1:428540/1-113 | ANENNQQK | IELTVSPENI | TVYEGEDVK | FTV TAKSDSK |
| WP_001885839.1:428540/1-113 | ANENNQQK | IELTVSPENI | TVYEGEDVK | FTV TAKSDSK |
| WP_150418747.1:428540/1-113 | ANENNQQK | IELTVSPENI | TVYEGEDVK | FTV TAKSDSK |
| WP_150415581.1:428540/1-113 | ANENNQQK | IELTVSPENI | TVYEGEDVK | FTV TAKSDSK |
| AAT10376.1:428540/1-113     | ANENNQQK | IELTVSPENI | TVYEGEDVK | FTV TAKSDSK |

50 60 70 80  
EPU95478.1:428540/1-113 LTKYNPSVSDR IS TNYKTNTDNHKK IAE ITIKNLKLNESQTVTLKA  
WP\_000295505.1:94206/1-113 LTKYNPSVSDR IS TNYKTNTDNHKK IAE ITIKNLKLNESQTVTLKA  
KXA56917.1:93205/1-113 LTKYNPSVSDR IS TNYKTNTDNHKK IAE ITIKNLKLNESQTVTLKA  
WP\_000477137.1:428540/1-113 LTKYNPSVSDR IS TNYKTNTDNHKK IAE ITIKNLKLNESQTVTLKA  
WP\_017650912.1:428540/1-113 LTKYNPSVSDR IS TNYKTNTDNHKK IAE ITIKNLKLNESQTVTLKA  
WP\_132935284.1:428540/1-113 LTKYNPSVSDR IS TNYKTNTDNHKK IAE ITIKNLKLNESQTVTLKA  
WP\_001933343.1:428540/1-113 LTKYNPSVSDR IS TNYKTNTDNHKK IAE ITIKNLKLNESQTVTLKA  
WP\_025195781.1:428540/1-113 LTKYNPSVSDR IS TNYKTNTDNHKK IAE ITIKNLKLNESQTVTLKA  
WP\_132868240.1:428540/1-113 LTKYNPSVSDR IS TNYKTNTDNHKK IAE ITIKNLKLNESQTVTLKA  
WP\_041980967.1:428540/1-113 LTKYNPSVSDR IS TNYKTNTDNHKK IAE ITIKNLKLNESQTVTLKA  
CFQ92576.1:130/1-113 LTKYNPSVSDR IS TNYKTNTDNHKK IAE ITIKNLKLNESQTVTLKA  
EPV41091.1:160272/1-113 LTKYNPSVSDR IS TNYKTNTDNHKK IAE ITIKNLKLNESQTVTLKA  
WP\_049458979.1:428540/1-113 LTKYNPSVSDR IS TNYKTNTDNHKK IAE ITIKNLKLNESQTVTLKA  
SQA16054.1:253365/1-113 LTKYNPSVSDR IS TNYKTNTDNHKK IAE ITIKNLKLNESQTVTLKA  
BAE45252.1:428540/1-113 LTKYNPSVSDR IS TNYKTNTDNHKK IAE ITIKNLKLNESQTVTLKA  
WP\_055345127.1:428540/1-113 LTKYNPSVSDR IS TNYKTNTDNHKK IAE ITIKNLKLNESQTVTLKA  
WP\_017650863.1:428540/1-113 LTKYNPSVSDR IS TNYKTNTDNHKK IAE ITIKNLKLNESQTVTLKA  
CNE84135.1:307419/1-113 LTKYNPSVSDR IS TNYKTNTDNHKK IAE ITIKNLKLNESQTVTLKA  
WP\_060457561.1:428540/1-113 LTKYNPSVSDR IS TNYKTNTDNHKK IAE ITIKNLKLNESQTVTLKA  
WP\_060458554.1:428540/1-113 LTKYNPSVSDR IS TNYKTNTDNHKK IAE ITIKNLKLNESQTVTLKA  
WP\_000477135.1:428540/1-113 LTKYNPSVSDR IS TNYKTNTDNHKK IAE ITIKNLKLNESQTVTLKA  
WP\_121070430.1:428540/1-113 LTKYNPSVSDR IS TNYKTNTDNHKK IAE ITIKNLKLNESQTVTLKA  
P27951.1:428540/1-113 LTKYNPSVSDR IS TNYKTNTDNHKK IAE ITIKNLKLNESQTVTLKA  
WP\_047199360.1:428540/1-113 LTKYNPSVSDR IS TNYKTNTDNHKK IAE ITIKNLKLNESQTVTLKA  
WP\_017647376.1:428540/1-113 LTKYNPSVSDR IS TNYKTNTDNHKK IAE ITIKNLKLNESQTVTLKA  
WP\_141445744.1:401513/1-113 LTKYNPSVSDR IS TNYKTNTDNHKK IAE ITIKNLKLNESQTVTLKA  
WP\_050152779.1:428540/1-113 LTKYNPSVSDR IS TNYKTNTDNHKK IAE ITIKNLKLNESQTVTLKA  
WP\_000477136.1:428540/1-113 LTKYNPSVSDR IS TNYKTNTDNHKK IAE ITIKNLKLNESQTVTLKA  
EPV99179.1:351463/1-113 LTKYNPSVSDR IS TNYKTNTDNHKK IAE ITIKNLKLNESQTVTLKA  
WP\_071150949.1:419531/1-113 LTKYNPSVSDR IS TNYKTNTDNHKK IAE ITIKNLKLNESQTVTLKA  
WP\_000477141.1:428540/1-113 LTKYNPSVSDR IS TNYKTNTDNHKK IAE ITIKNLKLNESQTVTLKA  
WP\_157140373.1:377489/1-113 LTKYNPSVSDR IS TNYKTNTDNHKK IAE ITIKNLKLNESQTVTLKA  
WP\_000477134.1:428540/1-113 LTKYNPSVSDR IS TNYKTNTDNHKK IAE ITIKNLKLNESQTVTLKA  
WP\_094754263.1:428540/1-113 LTKYNPSVSDR IS TNYKTNTDNHKK IAE ITIKNLKLNESQTVTLKA  
WP\_001905993.1:428540/1-113 LTKYNPSVSDR IS TNYKTNTDNHKK IAE ITIKNLKLNESQTVTLKA  
WP\_017645156.1:423535/1-113 LTKYNPSVSDR IS TNYKTNTDNHKK IAE ITIKNLKLNESQTVTLKA  
WP\_094969800.1:428540/1-113 LTKYNPSVSDR IS TNYKTNTDNHKK IAE ITIKNLKLNESQTVTLKA  
WP\_047211709.1:423535/1-113 LTKYNPSVSDR IS TNYKTNTDNHKK IAE ITIKNLKLNESQTVTLKA  
WP\_050198886.1:428540/1-113 LTKYNPSVSDR IS TNYKTNTDNHKK IAE ITIKNLKLNESQTVTLKA  
WP\_000477132.1:423535/1-113 LTKYNPSVSDR IS TNYKTNTDNHKK IAE ITIKNLKLNESQTVTLKA  
WP\_000477143.1:428540/1-113 LTKYNPSVSDR IS TNYKTNTDNHKK IAE ITIKNLKLNESQTVTLKA  
WP\_047198467.1:428540/1-113 LTKYNPSVSDR IS TNYKTNTDNHKK IAE ITIKNLKLNESQTVTLKA  
CAA41384.1:428540/1-113 LTKYNPSVSDR IS TNYKTNTDNHKK IAE ITIKNLKLNESQTVTLKA  
WP\_001880680.1:428540/1-113 LTKYNPSVSDR IS TNYKTNTDNHKK IAE ITIKNLKLNESQTVTLKA  
WP\_000477140.1:428540/1-113 LTKYNPSVSDR IS TNYKTNTDNHKK IAE ITIKNLKLNESQTVTLKA  
WP\_000477139.1:428540/1-113 LTKYNPSVSDR IS TNYKTNTDNHKK IAE ITIKNLKLNESQTVTLKA  
WP\_000477138.1:428540/1-113 LTKYNPSVSDR IS TNYKTNTDNHKK IAE ITIKNLKLNESQTVTLKA  
WP\_070841624.1:428540/1-113 LTKYNPSVSDR IS TNYKTNTDNHKK IAE ITIKNLKLNESQTVTLKA  
WP\_047205529.1:428540/1-113 LTKYNPSVSDR IS TNYKTNTDNHKK IAE ITIKNLKLNESQTVTLKA  
WP\_060800989.1:428540/1-113 LTKYNPSVSDR IS TNYKTNTDNHKK IAE ITIKNLKLNESQTVTLKA  
WP\_000477144.1:428540/1-113 LTKYNPSVSDR IS TNYKTNTDNHKK IAE ITIKNLKLNESQTVTLKA  
WP\_079219395.1:428540/1-113 LTKYNPSVSDR IS TNYKTNTDNHKK IAE ITIKNLKLNESQTVTLKA  
WP\_150411773.1:428540/1-113 LTKYNPSVSDR IS TNYKTNTDNHKK IAE ITIKNLKLNESQTVTLKA  
WP\_001885839.1:428540/1-113 LTKYNPSVSDR IS TNYKTNTDNHKK IAE ITIKNLKLNESQTVTLKA  
WP\_150418747.1:428540/1-113 LTKYNPSVSDR IS TNYKTNTDNHKK IAE ITIKNLKLNESQTVTLKA  
WP\_150415581.1:428540/1-113 LTKYNPSVSDR IS TNYKTNTDNHKK IAE ITIKNLKLNESQTVTLKA  
AAT10376.1:428540/1-113 LTKYNPSVSDR IS TNYKTNTDNHKK IAE ITIKNLKLNESQTVTLKA

|                             | 100            | 110        |
|-----------------------------|----------------|------------|
| EPU95478.1:428540/1-113     | KDDSGNVVEKTFTI | TVQKKKEEKQ |
| WP_000295505.1:94206/1-113  | KDDSGNVVEKTFTI | TVQKKKEEKQ |
| KXA56917.1:93205/1-113      | KDDSGNVVEKTFTI | TVQKKKEEKQ |
| WP_000477137.1:428540/1-113 | KDDSGNVVEKTFTI | TVQKKKEEKQ |
| WP_017650912.1:428540/1-113 | KDDSGNVVEKTFTI | TVQKKKEEKQ |
| WP_132935284.1:428540/1-113 | KDDSGNVVEKTFTI | TVQKKKEEKQ |
| WP_001933343.1:428540/1-113 | KDDSGNVVEKTFTI | TVQKKKEEKQ |
| WP_025195781.1:428540/1-113 | KDDSGNVVEKTFTI | TVQKKKEEKQ |
| WP_132868240.1:428540/1-113 | KDDSGNVVEKTFTI | TVQKKKEEKQ |
| WP_041980967.1:428540/1-113 | KDDSGNVVEKTFTI | TVQKKKEEKQ |
| CFQ92576.1:130/1-113        | KDDSGNVVEKTFTI | TVQKKKEEKQ |
| EPV41091.1:160272/1-113     | KDDSGNVVEKTFTI | TVQKKKEEKQ |
| WP_049458979.1:428540/1-113 | KDDSGNVVEKTFTI | TVQKKKEEKQ |
| SQA16054.1:253365/1-113     | KDDSGNVVEKTFTI | TVQKKKEEKQ |
| BAE45252.1:428540/1-113     | KDDSGNVVEKTFTI | TVQKKKEEKQ |
| WP_055345127.1:428540/1-113 | KDDSGNVVEKTFTI | TVQKKKEEKQ |
| WP_017650863.1:428540/1-113 | KDDSGNVVEKTFTI | TVQKKKEEKQ |
| CNE84135.1:307419/1-113     | KDDSGNVVEKTFTI | TVQKKKEEKQ |
| WP_060457561.1:428540/1-113 | KDDSGNVVEKTFTI | TVQKKKEEKQ |
| WP_060458554.1:428540/1-113 | KDDSGNVVEKTFTI | TVQKKKEEKQ |
| WP_000477135.1:428540/1-113 | KDDSGNVVEKTFTI | TVQKKKEEKQ |
| WP_121070430.1:428540/1-113 | KDDSGNVVEKTFTI | TVQKKKEEKQ |
| P27951.1:428540/1-113       | KDDSGNVVEKTFTI | TVQKKKEEKQ |
| WP_047199360.1:428540/1-113 | KDDSGNVVEKTFTI | TVQKKKEEKQ |
| WP_017647376.1:428540/1-113 | KDDSGNVVEKTFTI | TVQKKKEEKQ |
| WP_141445744.1:401513/1-113 | KDDSGNVVEKTFTI | TVQKKKEEKQ |
| WP_050152779.1:428540/1-113 | KDDSGNVVEKTFTI | TVQKKKEEKQ |
| WP_000477136.1:428540/1-113 | KDDSGNVVEKTFTI | TVQKKKEEKQ |
| EPV99179.1:351463/1-113     | KDDSGNVVEKTFTI | TVQKKKEEKQ |
| WP_071150949.1:419531/1-113 | KDDSGNVVEKTFTI | TVQKKKEEKQ |
| WP_000477141.1:428540/1-113 | KDDSGNVVEKTFTI | TVQKKKEEKQ |
| WP_157140373.1:377489/1-113 | KDDSGNVVEKTFTI | TVQKKKEEKQ |
| WP_000477134.1:428540/1-113 | KDDSGNVVEKTFTI | TVQKKKEEKQ |
| WP_094754263.1:428540/1-113 | KDDSGNVVEKTFTI | TVQKKKEEKQ |
| WP_001905993.1:428540/1-113 | KDDSGNVVEKTFTI | TVQKKKEEKQ |
| WP_017645156.1:423535/1-113 | KDDSGNVVEKTFTI | TVQKKKEEKQ |
| WP_094969800.1:428540/1-113 | KDDSGNVVEKTFTI | TVQKKKEEKQ |
| WP_047211709.1:423535/1-113 | KDDSGNVVEKTFTI | TVQKKKEEKQ |
| WP_050198886.1:428540/1-113 | KDDSGNVVEKTFTI | TVQKKKEEKQ |
| WP_000477132.1:423535/1-113 | KDDSGNVVEKTFTI | TVQKKKEEKQ |
| WP_000477143.1:428540/1-113 | KDDSGNVVEKTFTI | TVQKKKEEKQ |
| WP_047198467.1:428540/1-113 | KDDSGNVVEKTFTI | TVQKKKEEKQ |
| CAA41384.1:428540/1-113     | KDDSGNVVEKTFTI | TVQKKKEEKQ |
| WP_001880680.1:428540/1-113 | KDDSGNVVEKTFTI | TVQKKKEEKQ |
| WP_000477140.1:428540/1-113 | KDDSGNVVEKTFTI | TVQKKKEEKQ |
| WP_000477139.1:428540/1-113 | KDDSGNVVEKTFTI | TVQKKKEEKQ |
| WP_000477138.1:428540/1-113 | KDDSGNVVEKTFTI | TVQKKKEEKQ |
| WP_070841624.1:428540/1-113 | KDDSGNVVEKTFTI | TVQKKKEEKQ |
| WP_047205529.1:428540/1-113 | KDDSGNVVEKTFTI | TVQKKKEEKQ |
| WP_060800989.1:428540/1-113 | KDDSGNVVEKTFTI | TVQKKKEEKQ |
| WP_000477144.1:428540/1-113 | KDDSGNVVEKTFTI | TVQKKKEEKQ |
| WP_079219395.1:428540/1-113 | KDDSGNVVEKTFTI | TVQKKKEEKQ |
| WP_150411773.1:428540/1-113 | KDDSGNVVEKTFTI | TVQKKKEEKQ |
| WP_001885839.1:428540/1-113 | KDDSGNVVEKTFTI | TVQKKKEEKQ |
| WP_150418747.1:428540/1-113 | KDDSGNVVEKTFTI | TVQKKKEEKQ |
| WP_150415581.1:428540/1-113 | KDDSGNVVEKTFTI | TVQKKKEEKQ |
| AAT10376.1:428540/1-113     | KDDSGNVVEKTFTI | TVQKKKEEKQ |

**Appendix Figure S4: Alignment of IgI3 domain sequences from  $\beta$  protein of GBS.** Alignment of IgI3 domain sequences of  $\beta$  protein in the BLAST database.

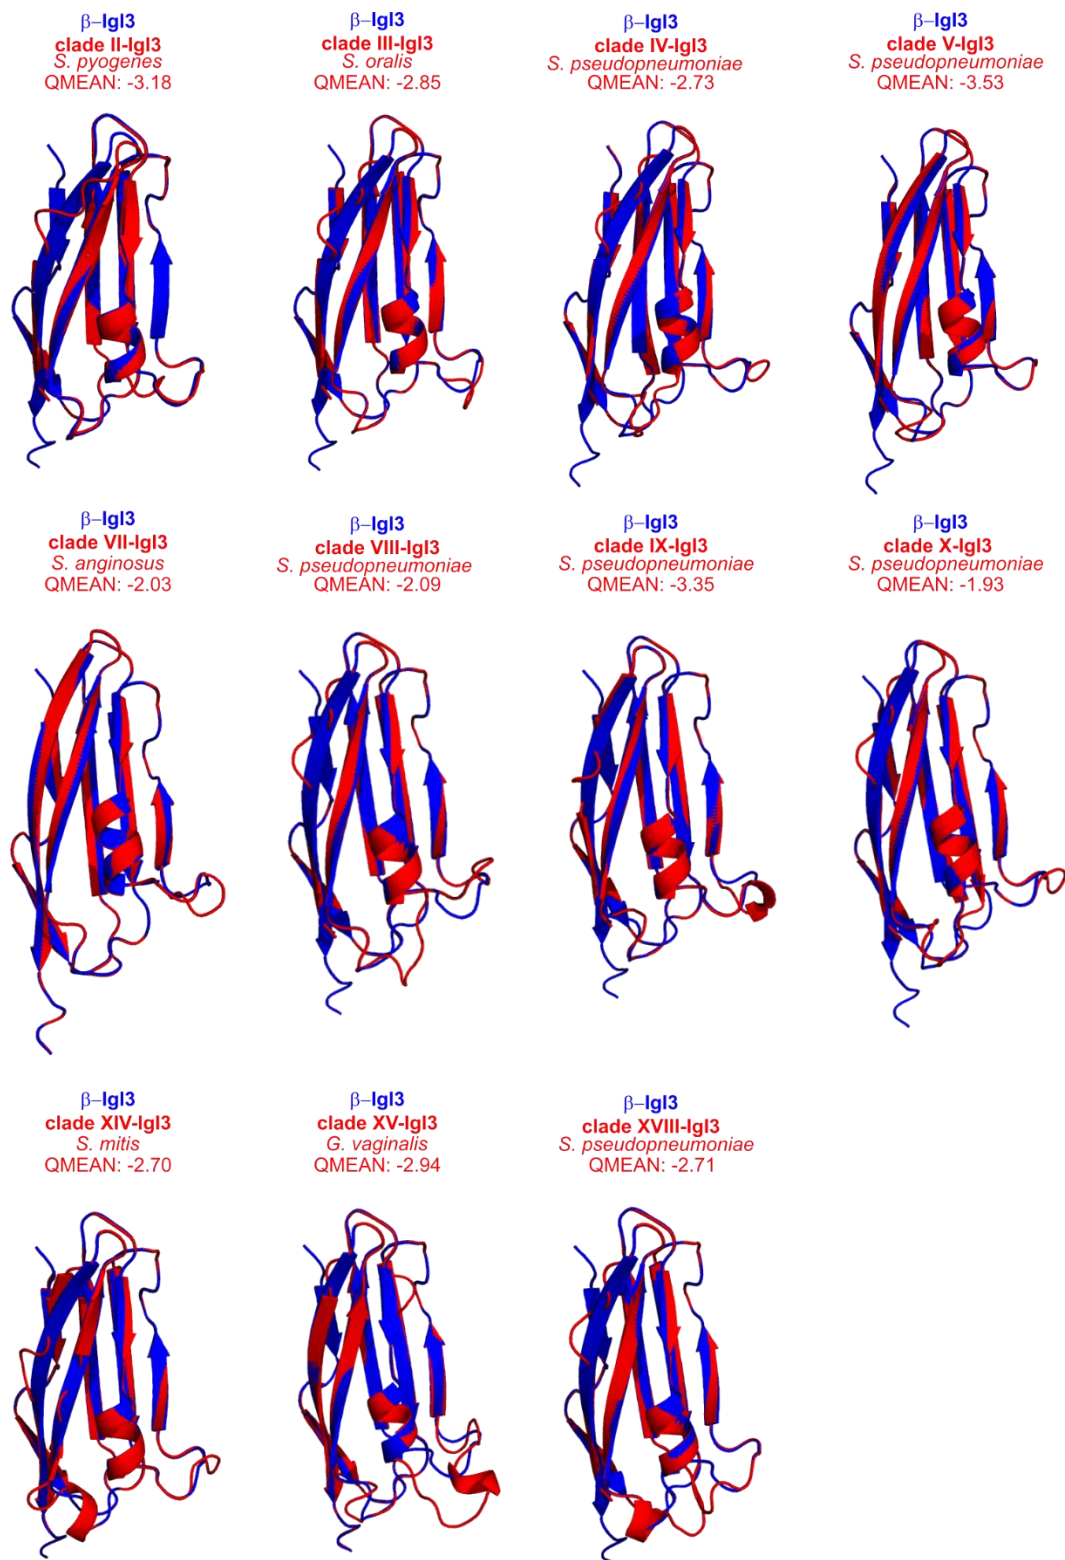

**Appendix Figure S5: Predicted structures of IgI3 homologs.** Structure of  $\beta$ -IgI3 homologs was predicted using SWISS-MODEL in which the  $\beta$ -IgI3 was used as a template. The predicted structures of 11 sequences (red) are superimposed onto  $\beta$ -IgI3 structure (blue), with the clade, bacterial species and QMEAN score of the model shown.



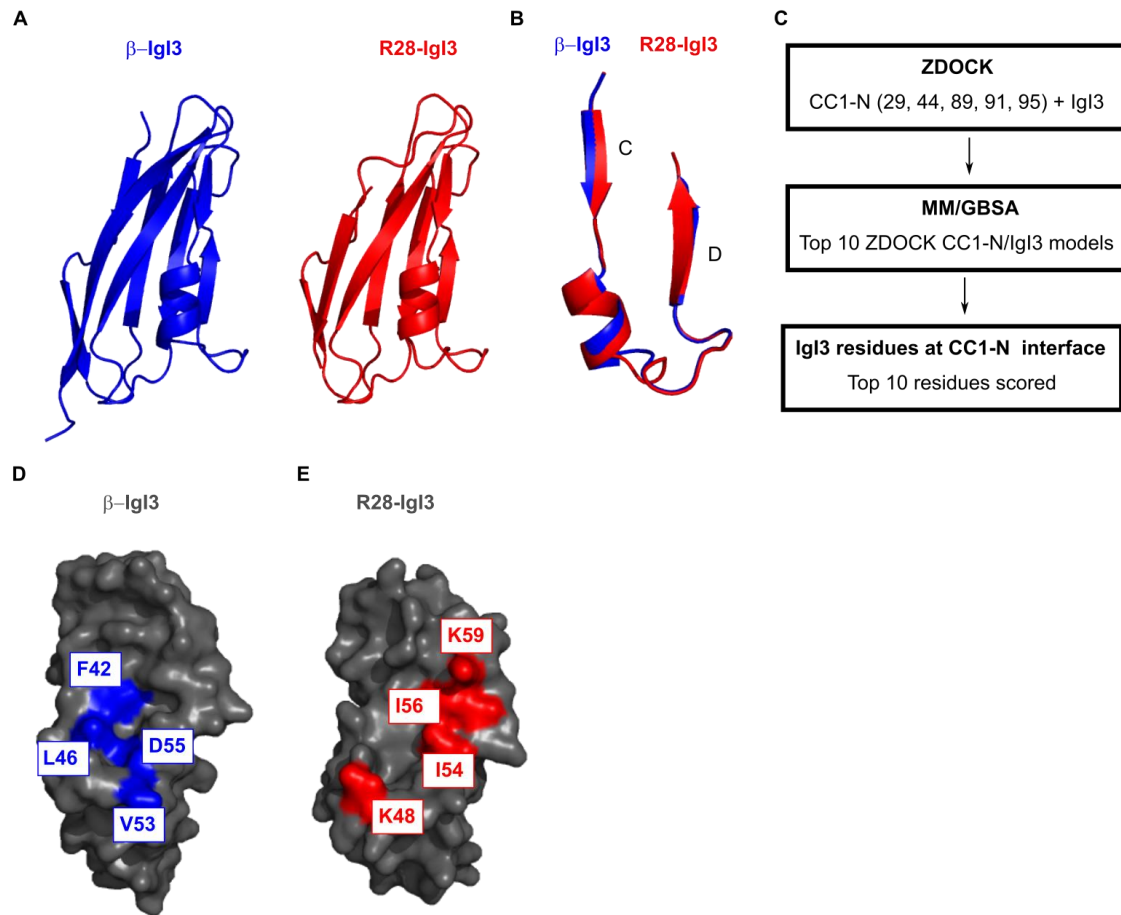

**Appendix Figure S6: IgI3 domains bind CEACAM1 through alternative binding pockets.**

**A)** Structure of  $\beta$ -IgI3 and predicted structure of R28-IgI3. **B)** Superposition of the known IgI3 domain from  $\beta$  protein (blue) onto predicted structure of IgI3 domain from R28 (red), only the C to D strand region is shown. **C)** Pipeline showing prediction of key and unfavourable IgI3 residues at the CEACAM1 binding interface.  $\beta$ -IgI3 and R28-IgI3 docking to CEACAM1-N (CC1-N) was simulated 50 times using ZDOCK. CC1-N residues 29, 44, 89, 91 and 95 were set as important binding residues. Each simulation was analysed by MM/GBSA analysis to quantify the free energy binding for each residue independently. **D)** Surface structure of  $\beta$ -IgI3 shown, with key (F42, L46 and V53) or unfavourable (D55) residues required for CC1-N binding shown in blue. **E)** Surface structure of R28-IgI3 shown, with key (K48, I54, I56 and K59) residues required for CC1-N binding shown in red.

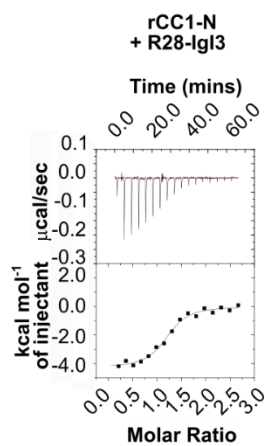

**Appendix Figure S7: Isothermal titration calorimetry (ITC) binding curve of CEACAM1-N and R28-IgI3.** Representative ITC plot for rCEACAM1 (CC1)-N domain and R28-IgI3 duplicates. Experiments were performed using an iTC200 instrument (GE Healthcare), at 25 °C with 16 injections of 2.42  $\mu\text{L}$  aliquots. All data were analyzed using Origin 7.0 software.

| Species                                  | Strain                             | Notes                                              | Growth*          | Reference <sup>s</sup>                  |
|------------------------------------------|------------------------------------|----------------------------------------------------|------------------|-----------------------------------------|
| <i>Streptococcus pyogenes</i> (GAS)      | M1 5448                            |                                                    | TH-Y, 37°C       | <sup>1</sup>                            |
|                                          | M2                                 |                                                    | TH-Y, 37°C       | N. van Sorge, this study                |
|                                          | M3                                 |                                                    | TH-Y, 37°C       | N. van Sorge, this study                |
|                                          | M6                                 |                                                    | TH-Y, 37°C       | N. van Sorge, this study                |
|                                          | M11                                |                                                    | TH-Y, 37°C       | N. van Sorge, this study                |
|                                          | M12                                |                                                    | TH-Y, 37°C       | N. van Sorge, this study                |
|                                          | M89                                |                                                    | TH-Y, 37°C       | N. van Sorge, this study                |
|                                          | AL368                              |                                                    | TH-Y, 37°C       | <sup>2</sup>                            |
| <i>Streptococcus agalactiae</i> (GBS)    | A909                               | Serotype Ia; <i>bac</i> positive                   | TH, 37°C         | <sup>3</sup>                            |
|                                          | A909Δ <i>bac</i>                   |                                                    | TH, 37°C         | <sup>4</sup>                            |
|                                          | A909Δ <i>bac</i> + pLZ. <i>bac</i> |                                                    | TH + k + s, 37°C | <sup>4</sup>                            |
|                                          | A909Δ <i>bca</i>                   |                                                    | TH + k, 37°C     | E. Mover, T. Areschoug, Lund University |
|                                          | A909Δ <i>cap</i>                   |                                                    | TH + k, 37°C     | E. Mover, T. Areschoug, Lund University |
|                                          | A909Δ <i>bac</i> Δ <i>cap</i>      |                                                    | TH + k, 37°C     | E. Mover, T. Areschoug, Lund University |
|                                          | BS39                               | Serotype Ia; <i>bac</i> negative; invasive isolate | TH, 37°C         | G. Lindahl, this study                  |
|                                          | 515                                | Serotype Ia; <i>bac</i> negative                   | TH, 37°C         | <sup>5</sup>                            |
|                                          | BS22                               | Serotype Ib; <i>bac</i> positive                   | TH, 37°C         | <sup>5</sup>                            |
|                                          | H36B                               | Serotype Ib; <i>bac</i> positive                   | TH, 37°C         | ATCC #BAA-1174                          |
|                                          | BS29                               | Serotype II; <i>bac</i> positive; invasive isolate | TH, 37°C         | G. Lindahl, this study                  |
|                                          | 18RS21                             | Serotype II; <i>bac</i> negative                   | TH, 37°C         | ATCC #BAA1175                           |
|                                          | BM110                              | Serotype III; <i>bac</i> negative                  | TH, 37°C         | <sup>6</sup>                            |
|                                          | COH1                               | Serotype III; <i>bac</i> negative                  | TH, 37°C         | ATCC #BAA-1176                          |
|                                          | SBL3066                            | Serotype V; <i>bac</i> positive; invasive isolate  | TH, 37°C         | G. Lindahl, this study                  |
|                                          | NCTC10/84                          | Serotype V; <i>bac</i> negative                    | TH, 37°C         | ATCC #49447                             |
|                                          | SB35                               | <i>bac</i> positive                                | TH, 37°C         | <sup>6</sup>                            |
|                                          | SB10                               | <i>bac</i> positive                                | TH, 37°C         | <sup>5</sup>                            |
|                                          | SB20                               | Serotype III; <i>bac</i> positive                  | TH, 37°C         | <sup>5</sup>                            |
|                                          | BS26                               | <i>bac</i> positive                                | TH, 37°C         | <sup>5</sup>                            |
| H1147 (PHEGBS0159)                       | <i>alp3</i> positive               | TH, 37°C                                           | <sup>7</sup>     |                                         |
| <i>Streptococcus zooepidemicus</i> (GCS) | CS2                                | Invasive infection                                 | TH, 37°C         | G. Lindahl, this study                  |
|                                          | CS3                                | Invasive infection                                 | TH, 37°C         | G. Lindahl, this study                  |
|                                          | CS4                                | Invasive infection                                 | TH, 37°C         | G. Lindahl, this study                  |

|                                         |                                                                                   |                                                                                                                                                                                                                                                                      |                                                                                                                                              |                                                                                                                                                                                                                                                                                                            |
|-----------------------------------------|-----------------------------------------------------------------------------------|----------------------------------------------------------------------------------------------------------------------------------------------------------------------------------------------------------------------------------------------------------------------|----------------------------------------------------------------------------------------------------------------------------------------------|------------------------------------------------------------------------------------------------------------------------------------------------------------------------------------------------------------------------------------------------------------------------------------------------------------|
|                                         | CS7<br>CS8<br>L31<br>L32                                                          | Invasive infection<br>Invasive infection<br>Invasive infection<br>Invasive infection                                                                                                                                                                                 | TH, 37°C<br>TH, 37°C<br>TH, 37°C<br>TH, 37°C                                                                                                 | G. Lindahl, this study<br>G. Lindahl, this study<br>G. Lindahl, this study<br>G. Lindahl, this study                                                                                                                                                                                                       |
| <i>Streptococcus dysgalactiae</i> (GGS) | G148<br>GS1<br>GS2<br>GS3<br>GS4<br>GS5<br>GS6<br>GS7<br>GS8<br>GS9<br>L33<br>L34 | Invasive infection<br>Invasive infection | TH, 37°C<br>TH, 37°C | <sup>8</sup><br>G. Lindahl, this study<br>G. Lindahl, this study |
| <i>Streptococcus pneumoniae</i>         | PBCN22<br>D39<br>TIGR4<br>PBCN57<br>PBCN79<br>PBCN24<br>PBCN133                   |                                                                                                                                                                                                                                                                      | TH, 37°C<br>TH, 37°C<br>TH, 37°C<br>TH, 37°C<br>TH, 37°C<br>TH, 37°C<br>TH, 37°C                                                             | UMC Utrecht, this study<br>NCTC #7466<br>BAA-334<br>UMC Utrecht, this study<br>UMC Utrecht, this study<br>UMC Utrecht, this study<br>UMC Utrecht, this study                                                                                                                                               |
| <i>Enterococcus faecium</i>             | E8284<br>E4413<br>E656<br>E4227<br>E7313<br>E7098                                 |                                                                                                                                                                                                                                                                      | TH, 37°C<br>TH, 37°C<br>TH, 37°C<br>TH, 37°C<br>TH, 37°C<br>TH, 37°C                                                                         | <sup>9</sup><br><sup>9</sup><br><sup>9</sup><br><sup>9</sup><br><sup>9</sup><br><sup>9</sup>                                                                                                                                                                                                               |
| <i>Enterococcus faecalis</i>            | E02500<br>E02504<br>E02608<br>E02835                                              | Human blood isolate<br>Human blood isolate<br>Human blood isolate<br>Human blood isolate                                                                                                                                                                             | TH, 37°C<br>TH, 37°C<br>TH, 37°C<br>TH, 37°C                                                                                                 | UMC Utrecht, this study<br>UMC Utrecht, this study<br>UMC Utrecht, this study<br>UMC Utrecht, this study                                                                                                                                                                                                   |

|                              | E4877<br>E6568                                              | Human faecal isolate<br>Human faecal isolate | TH, 37°C<br>TH, 37°C                                                                    | UMC Utrecht, this study<br>UMC Utrecht, this study                                                                  |
|------------------------------|-------------------------------------------------------------|----------------------------------------------|-----------------------------------------------------------------------------------------|---------------------------------------------------------------------------------------------------------------------|
| <i>Staphylococcus aureus</i> | MW2<br>MRSA252<br>PS66<br>80286<br>USA300<br>N315<br>Newman |                                              | TSB, 37°C<br>TSB, 37°C<br>TSB, 37°C<br>TSB, 37°C<br>TSB, 37°C<br>TSB, 37°C<br>TSB, 37°C | ATCC #BAA-1707<br>ATCC #BAA-1720<br>U. Bläsi, Vienna <sup>10</sup><br>ATCC #BAA-1556 <sup>11</sup><br><sup>12</sup> |

0 **Appendix Table S1. Bacterial strains used in this study.** \* Growth media as follows, Todd-Hewitt (TH) broth, Todd-Hewitt + 0.6% yeast (TH-Y) broth,  
1 Tryptic Soy (TS) broth. Media was supplemented with 500 µg/ml kanamycin (k) and/or 70 µg/ml spectinomycin (s).<sup>5</sup> Strain names available from American  
2 Type Culture Collection (ATCC) or National Collection of Type Cultures (NCTC).<sup>1</sup> Chatellier, S. *et al.* Genetic relatedness and superantigen expression in  
3 group A Streptococcus serotype M1 isolates from patients with severe and nonsevere invasive diseases. *Infect Immun* **68**, 3523–3534 (2000).<sup>2</sup> Stålhammar-  
4 Carlemalm, M., Areschoug, T., Larsson, C. & Lindahl, G. The R28 protein of Streptococcus pyogenes is related to several group B streptococcal surface  
5 proteins, confers protective immunity and promotes binding to human epithelial cells. *Mol Microbiol* **33**, 208–219 (1999).<sup>3</sup> Michel, J. L. *et al.* Large, identical,  
6 tandem repeating units in the C protein alpha antigen gene, bca, of group B streptococci. *Proc Natl Acad Sci U S A* **89**, 10060–10064 (1992).<sup>4</sup> Areschoug, T.,  
7 Stålhammar-Carlemalm, M., Karlsson, I. & Lindahl, G. Streptococcal β protein has separate binding sites for human factor H and IgA-Fc. *J Biol Chem* **277**,  
8 12642–12648 (2002).<sup>5</sup> Areschoug, T., Linse, S., Stålhammar-Carlemalm, M., Hedén, L. O. & Lindahl, G. A proline-rich region with a highly periodic sequence  
9 in streptococcal β protein adopts the polyproline II structure and is exposed on the bacterial surface. *J Bacteriol* **184**, 6376–6383 (2002).<sup>6</sup> Stålhammar-  
10 Carlemalm, M., Stenberg, L. & Lindahl, G. Protein Rib: a novel group B streptococcal cell surface protein that confers protective immunity and is expressed  
11 by most strains causing invasive infections. *J Exp Med* **177**, 1593–603 (1993).<sup>7</sup> Jauneikaite, E. *et al.* Serial clustering of late-onset group B streptococcal  
12 infections in the neonatal unit: a genomic re-evaluation of causality. *Clin Infect Dis* **67**, 854–860 (2018).<sup>8</sup> Kronvall, G., Simmons, A., Myhre, E. B. & Jonsson,  
13 S. Specific absorption of human serum albumin, immunoglobulin A, and immunoglobulin G with selected strains of group A- and G streptococci. *Infect Immun*  
14 **25**, 1–10 (1979).<sup>9</sup> Arredondo-Alonso, S. *et al.* Plasmids shaped the recent emergence of the major nosocomial pathogen Enterococcus faecium.  
15 *mBio* **11**, e03284-19 (2020).<sup>10</sup> Winstel, V. *et al.* Wall teichoic acid glycosylation governs Staphylococcus aureus nasal colonization. *mBio* **6**,

- 16 e00632-15 (2015). <sup>11</sup> Kuroda, M. *et al.* Whole genome sequencing of methicillin-resistant *Staphylococcus aureus*. *Lancet* **357**, 1225–40 (2001).
- 17 <sup>12</sup> Baba, T., Bae, T., Schneewind, O., Takeuchi, F. & Hiramatsu, K. Genome sequence of *Staphylococcus aureus* strain Newman and comparative
- 18 analysis of staphylococcal genomes: Polymorphism and evolution of two major pathogenicity islands. *J Bacteriol* **190**, 300–310 (2008).

| Vector                  | Protein                | Expression system |
|-------------------------|------------------------|-------------------|
| pcDNA3.4.CEACAM1        | rCEACAM1-His           | Expi293F          |
| pcDNA3.4.CEACAM3        | rCEACAM3-His           | Expi293F          |
| pcDNA3.4.CEACAM5        | rCEACAM5-His           | Expi293F          |
| pcDNA3.4.CEACAM6        | rCEACAM6-His           | Expi293F          |
| pcDNA3.4.CEACAM8        | rCEACAM8-His           | Expi293F          |
| pRSET-C-CEACAM1N        | rCEACAM1-N-His         | <i>E. coli</i> RG |
| pRSET-C-CEACAM1NΔF29A   | rCEACAM1-NΔF29A-His    | <i>E. coli</i> RG |
| pRSET-C-CEACAM1NΔQ44A   | rCEACAM1-NΔQ44A-His    | <i>E. coli</i> RG |
| pRSET-C-CEACAM1NΔA49V   | rCEACAM1-NΔA49V-His    | <i>E. coli</i> RG |
| pRSET-C-CEACAM1NΔQ89A   | rCEACAM1-NΔQ89A-His    | <i>E. coli</i> RG |
| pRSET-C-CEACAM1NΔL95A   | rCEACAM1-NΔL95A-His    | <i>E. coli</i> RG |
| pRSET-C-CEACAM1NΔV96A   | rCEACAM1-NΔV96A-His    | <i>E. coli</i> RG |
| pRSET-C-CEACAM1NΔN97A   | rCEACAM1-NΔN97A-His    | <i>E. coli</i> RG |
| pRSET-C-CEACAM1A1B1A2   | rCEACAM1-A1B1A2-His    | <i>E. coli</i> RG |
| pRSET-C-CEACAM3N        | rCEACAM3-N-His         | <i>E. coli</i> RG |
| pRSET-C-CEACAM5N        | rCEACAM5-N-His         | <i>E. coli</i> RG |
| pRSET-C-CEACAM6N        | rCEACAM6-N-His         | <i>E. coli</i> RG |
| pRSET-C-CEACAM8N        | rCEACAM8-N-His         | <i>E. coli</i> RG |
|                         |                        |                   |
| pET21d-CEACAM1N         | rCEACAM1-N             | <i>E. coli</i> RG |
| pET21d-CEACAM1NΔF29A    | rCEACAM1-NΔF29A        | <i>E. coli</i> RG |
| pET21d-CEACAM1NΔQ44A    | rCEACAM1-NΔQ44A        | <i>E. coli</i> RG |
| pET21d-CEACAM1NΔA49V    | rCEACAM1-NΔA49V        | <i>E. coli</i> RG |
| pET21d-CEACAM1NΔQ89A    | rCEACAM1-NΔQ89A        | <i>E. coli</i> RG |
| pET21d-CEACAM1NΔL95A    | rCEACAM1-NΔL95A        | <i>E. coli</i> RG |
| pET21d-CEACAM1NΔV96A    | rCEACAM1-NΔV96A        | <i>E. coli</i> RG |
| pET21d-CEACAM1NΔN97A    | rCEACAM1-NΔN97A        | <i>E. coli</i> RG |
|                         |                        |                   |
| pRSET-C-B6N             | rB6N-His               | <i>E. coli</i> RG |
| pRSET-C-IgABR           | rIgABR-His             | <i>E. coli</i> RG |
| pRSET-C-B6C             | rB6C-His               | <i>E. coli</i> RG |
| pRSET-C-β-IgSF / β-IgI3 | rβIgSF-His, β-IgI3-His | <i>E. coli</i> RG |
|                         | rβIgI3ΔF42A-His        | <i>E. coli</i> RG |
|                         | rβIgI3ΔL45A-His        | <i>E. coli</i> RG |
|                         | rβIgI3ΔL46A-His        | <i>E. coli</i> RG |
|                         | rβIgI3ΔS52A-His        | <i>E. coli</i> RG |
|                         | rβIgI3ΔV53A-His        | <i>E. coli</i> RG |
|                         | rβIgI3ΔD55A-His        | <i>E. coli</i> RG |
| pRSET-C-β75KN           | rβ75KN-His             | <i>E. coli</i> RG |
| pRSET-C-R28-IgI3        | rR28-IgI3-His          | <i>E. coli</i> RG |

**Appendix Table S2: Expression vectors constructs.** Open reading frames (ORFs) coding the extracellular domains of CEACAMs were cloned into pcDNA3.4 vectors, and proteins were expressed in Expi293F cells. ORFs coding the N domains of CEACAMs, the A1B1A2 domain of CEACAM1 and β protein domains were cloned into pRSET-C vectors, and proteins were expressed in *E. coli*.

|               | <b>K<sub>D</sub> (nM)</b> | <b>ΔH (kcal mol<sup>-1</sup>)</b> | <b>TΔS (kcal mol<sup>-1</sup>)</b> |
|---------------|---------------------------|-----------------------------------|------------------------------------|
| <b>β-IgSF</b> |                           |                                   |                                    |
| rCC1-N        | 96±2                      | -4.7±0.3                          | +4.9                               |
| rCC3-N        | No Binding Observed       |                                   |                                    |
| rCC5-N        | 152±27                    | -2.2±0.1                          | +7.1                               |
| rCC6-N        | No Binding Observed       |                                   |                                    |
| rCC8-N        | No Binding Observed       |                                   |                                    |

**Appendix Table S3: Isothermal Titration Calorimetry (ITC) binding curves constants and thermodynamic parameters for CEACAM-N and β-IgSF interactions.** Experiments were performed using β-IgI3 and N domains of (r)CEACAM1 (CC1), CEACAM3 (CC3), CEACAM5 (CC5), CEACAM6 (CC6) and CEACAM8 (CC8) on an iTC200 instrument (GE Healthcare), at 25 °C with 16 injections of 2.42 μL aliquots. All data were analyzed using Origin 7.0 software.



| <b><math>\beta</math>-IgI-CEACAM1-N</b> |                      |
|-----------------------------------------|----------------------|
| <b>Data collection</b>                  |                      |
| Space group                             | I4122                |
| Cell dimensions                         |                      |
| $a, b, c$ (Å)                           | 131.62 131.62 257.07 |
| $\alpha, \beta, \gamma$ (°)             | 90.00 90.00 90.00    |
| Resolution (Å)                          | 48.57-3.25           |
| $R_{\text{merge}}$                      | 0.076 (1.386)        |
| $R_{p.i.m}$                             | 0.035 (0.635)        |
| $I / \sigma I$                          | 18.2 (2.2)           |
| Completeness (%)                        | 99.8 (99.8)          |
| Redundancy                              | 10.7 (10.9)          |
| $CC_{1/2}$                              | 0.999 (0.919)        |
| <b>Refinement</b>                       |                      |
| Resolution (Å)                          | 48.57-3.25           |
| No. reflections                         | 18198                |
| $R_{\text{work}} / R_{\text{free}}$     | 21.8/24.4            |
| No. atoms                               |                      |
| Protein                                 | 3311                 |
| Water                                   | 1                    |
| Ligand                                  | 37                   |
| $B$ -factors                            |                      |
| Protein                                 | 161.19               |
| Water                                   | 152.40               |
| Ligands                                 | 193.10               |
| R.m.s. deviations                       |                      |
| Bond lengths (Å)                        | 0.004                |
| Bond angles (°)                         | 1.422                |

**Appendix Table S4. Data collection and refinement statistics for  $\beta$ -IgI3 and CEACAM1 (CC1)-N.** Values in parentheses are for highest-resolution shell.

| <b>β-IgI3 atom</b>                                                                                                                           | <b>Distance (Å)</b>                                                                                                                                                          | <b>CC1-N atom</b>                                                                                                                                                                                                                                              |
|----------------------------------------------------------------------------------------------------------------------------------------------|------------------------------------------------------------------------------------------------------------------------------------------------------------------------------|----------------------------------------------------------------------------------------------------------------------------------------------------------------------------------------------------------------------------------------------------------------|
| L40                                                                                                                                          | 3.88<br>3.86<br>3.65<br>3.24<br>3.27                                                                                                                                         | S93 [C]<br>S93 [O]<br>D94 [N]<br>D94 [CA]<br>D94 [CB]                                                                                                                                                                                                          |
| D41 [CA]<br>D41 [OD1]<br>D41 [C]                                                                                                             | 3.53<br>3.66<br>3.49                                                                                                                                                         | S93 [O]<br>S93 [CB]<br>S93 [O]                                                                                                                                                                                                                                 |
| F42 [N]<br><br>F42 [CA]<br>F42 [CB]<br><br>F42 [CG]<br><br><br>F42 [CD2]<br><br><br><br><br><br><br><br><br><br>F42 [CE2]<br><br><br>F42 [C] | 3.72<br>2.57<br>3.40<br>3.34<br>3.66<br>3.77<br>3.65<br>3.97<br>3.36<br>3.93<br>3.59<br>3.75<br>3.89<br>3.57<br>3.59<br>3.84<br>3.84<br>3.79<br>3.84<br>3.79<br>3.94<br>3.93 | S93 [C]<br>S93 [O]<br>S93 [O]<br>S93 [O]<br>L95 [CD1]<br>S93 [O]<br>L95 [CD2]<br>L95 [CD1]<br>S93 [O]<br>D94 [CA]<br>D94 [C]<br>D94 [O]<br>L95 [N]<br>L95 [CB]<br>L95 [CD2]<br>L95 [CG]<br>L95 [CD1]<br>D94 [C]<br>D94 [O]<br>L95 [CB]<br>L95 [CD2]<br>S93 [O] |
| S43 [OG]                                                                                                                                     | 3.95                                                                                                                                                                         | S93 [OG]                                                                                                                                                                                                                                                       |
| L46 [CB]<br><br><br><br>L46 [CG]<br><br>L46 [CD1]<br><br><br>L46 [CD2]<br>L46 [C]<br>L46 [O]                                                 | 3.79<br>3.54<br>3.52<br>3.99<br>3.75<br>3.68<br>3.84<br>3.34<br>3.62<br>3.39<br>3.39<br>3.51<br>3.71<br>3.79                                                                 | F29 [CG]<br>F29 [CD2]<br>F29 [CE2]<br>F29 [CE1]<br>F29 [CZ]<br>F29 [CD1]<br>F29 [CD2]<br>F29 [CB]<br>F29 [CD1]<br>F29 [CG]<br>F29 [CD2]<br>L95 [CD1]<br>F29 [CZ]<br>F29 [CZ]                                                                                   |
| T47 [N]<br><br>T47 [CG2]                                                                                                                     | 3.96<br>3.80<br>3.54                                                                                                                                                         | F29 [CE1]<br>F29 [CZ]<br>F29 [CE1]                                                                                                                                                                                                                             |
| N50 [ND2]<br>N50 [O]                                                                                                                         | 3.36<br>3.19<br>3.35                                                                                                                                                         | I91 [CD1]<br>F29 [CE2]<br>F29 [CZ]                                                                                                                                                                                                                             |
| P51 [O]                                                                                                                                      | 3.67                                                                                                                                                                         | A49 [CB]                                                                                                                                                                                                                                                       |
| S52 [CA]                                                                                                                                     | 3.33                                                                                                                                                                         | T56 [OG1]                                                                                                                                                                                                                                                      |

|                       |                                                                      |                                                                                                      |
|-----------------------|----------------------------------------------------------------------|------------------------------------------------------------------------------------------------------|
| S52 [CB]              | 2.94<br>3.71                                                         | T56 [OG1]<br>T56 [CB]                                                                                |
| V53 [CB]<br>V53 [CG1] | 3.89<br>3.97<br>4.00<br>3.81<br>3.80<br>3.41<br>3.54<br>3.36<br>3.93 | Y31 [O]<br>G30 [C]<br>G30 [O]<br>Y31 [C]<br>Y31 [N]<br>S32 [N]<br>I91 [CG1]<br>I91 [CD1]<br>S32 [CB] |
| V53 [CG2]             | 3.69<br>3.76<br>3.46<br>3.98<br>3.54<br>3.32<br>3.65                 | G30 [C]<br>Y31 [N]<br>G30 [CA]<br>Y48 [N]<br>Y48 [C]<br>Y48 [O]<br>A49 [N]                           |
| V53 [C]               | 3.89<br>3.91<br>3.62                                                 | A49 [CA]<br>S32 [OG]<br>Q44 [NE2]                                                                    |
| V53 [O]               | 3.93<br>4.00<br>3.66<br>3.57<br>3.88<br>2.50                         | S32 [OG]<br>G47 [CA]<br>S32 [CB]<br>Q44 [CD]<br>Q44 [OE1]<br>Q44 [NE2]                               |
| S54 [N]               | 3.95<br>3.81                                                         | S32 [OG]<br>I91 [CD1]                                                                                |
| S54 [CA]              | 3.29                                                                 | Y34 [OH]                                                                                             |
| S54 [C]               | 3.47                                                                 | Y34 [OH]                                                                                             |
| S54 [O]               | 3.22                                                                 | I91 [CD1]                                                                                            |
| D55 [N]               | 3.24                                                                 | Y34 [OH]                                                                                             |
| D55 [CG]              | 3.74<br>3.80                                                         | G41 [N]<br>G41 [CA]                                                                                  |
| D55 [OD1]             | 3.82                                                                 | G41 [CA]                                                                                             |
| D55 [OD2]             | 3.50<br>3.75<br>2.90<br>3.37                                         | V39 [O]<br>D40 [C]<br>G41 [N]<br>G41 [CA]                                                            |
| I57 [CG2]             | 4.00                                                                 | L95 [CD2]                                                                                            |
| T59 [CB]              | 3.80                                                                 | L95 [O]                                                                                              |
| T59 [OG1]             | 2.86                                                                 | L95 [O]                                                                                              |
| T59 [CG2]             | 3.76<br>3.45<br>3.98<br>3.56                                         | L95 [CB]<br>L95 [CD2]<br>L95 [O]<br>L95 [CG]                                                         |
| Y61 [CZ]              | 3.45                                                                 | D94 [O]                                                                                              |
| Y61 [OH]              | 3.89<br>3.77<br>2.66                                                 | D94 [CB]<br>D94 [C]<br>D94 [O]                                                                       |
| Y61 [CE2]             | 3.43<br>3.43<br>3.98                                                 | V96 [CG1]<br>D94 [O]<br>L95 [O]                                                                      |

|           |      |           |
|-----------|------|-----------|
| Y61 [CD2] | 3.99 | V96 [CG1] |
|-----------|------|-----------|

**Appendix Table S5. Contact sites in ( $\beta$ -IgI3)(CEACAM1-N) complex.**  $\beta$ -IgI3 atoms within 4.0Å of CEACAM1-N (CC1-N) atoms are displayed as calculated using Ncont from the CCP4 suite of programs (Winn *et al*, 2011).

|                          | <b>K<sub>D</sub> (nM)</b> | <b>ΔH (kcal mol<sup>-1</sup>)</b> | <b>TΔS (kcal mol<sup>-1</sup>)</b> |
|--------------------------|---------------------------|-----------------------------------|------------------------------------|
| <b>Binding to rCC1-N</b> |                           |                                   |                                    |
| β-IgI3                   | 96±2                      | -4.7±0.3                          | +4.9                               |
| β-IgI3 <sup>F42A</sup>   | 16±15                     | -6.3±0.2                          | +5.2                               |
| β-IgI3 <sup>L45A</sup>   | 234±16                    | -4.7±0.1                          | +4.3                               |
| β-IgI3 <sup>L46A</sup>   | No Binding Observed       |                                   |                                    |
| β-IgI3 <sup>S52A</sup>   | 85±20                     | -4.8±0.1                          | +4.9                               |
| β-IgI3 <sup>V53A</sup>   | 562±44                    | -4.3±0.0                          | +4.3                               |
| β-IgI3 <sup>D55A</sup>   | 690±52                    | -3.1±0.1                          | +5.3                               |
| <b>Binding to β-IgI3</b> |                           |                                   |                                    |
| rCC1-N                   | 96±2                      | -4.7±0.3                          | +4.9                               |
| rCC1-N <sup>F29A</sup>   | No Binding Observed       |                                   |                                    |
| rCC1-N <sup>Q44A</sup>   | 996±116                   | -7.6±0.1                          | +0.6                               |
| rCC1-N <sup>Q89A</sup>   | No Binding Observed       |                                   |                                    |
| rCC1-N <sup>I91A</sup>   | No Binding Observed       |                                   |                                    |
| rCC1-N <sup>L95A</sup>   | 1350±460                  | -2.3±0.1                          | +5.7                               |
| rCC1-N <sup>V96A</sup>   | 370±4                     | -7.0±0.1                          | +1.8                               |
| rCC1-N <sup>N97A</sup>   | 490±120                   | -9.2±0.4                          | -0.5                               |

**Appendix Table S6: Isothermal Titration Calorimetry (ITC) binding curves constants and thermodynamic parameters for CEACAM1 (CC1)-N and β-IgI3 mutants.** Experiments were performed using an iTC200 instrument (GE Healthcare), at 25 °C with 16 injections of 2.42 μL aliquots. All data were analyzed using Origin 7.0 software.

| <b>Cell Line</b> | <b>Description</b>                                    |
|------------------|-------------------------------------------------------|
| Expi293F         | For expression of soluble recombinant proteins        |
| HeLa.EV          | HeLa cells carry empty vector                         |
| HeLa.CEACAM1     | HeLa cells stably expressing CEACAM1                  |
| HeLa.CEACAM3     | HeLa cells stably expressing CEACAM3                  |
| HeLa.CEACAM5     | HeLa cells stably expressing CEACAM5                  |
| HeLa.CEACAM6     | HeLa cells stably expressing CEACAM6                  |
| HeLa.CEACAM8     | HeLa cells stably expressing CEACAM8                  |
| CHO.EV           | Chinese Hamster Ovary cells carrying empty vector     |
| CHO.CEACAM1      | Chinese Hamster Ovary cells stably expressing CEACAM1 |
| CHO.CEACAM3      | Chinese Hamster Ovary cells stably expressing CEACAM3 |
| CHO.CEACAM5      | Chinese Hamster Ovary cells stably expressing CEACAM5 |
| CHO.CEACAM6      | Chinese Hamster Ovary cells stably expressing CEACAM6 |
| CHO.CEACAM8      | Chinese Hamster Ovary cells stably expressing CEACAM8 |

**Appendix Table S7: Cell lines used in this study.**

| Target                                            | Clone or catalog # | Conjugate | Manufacturer                   | Link                                                                                                                                                                                                                                                                                                                        |
|---------------------------------------------------|--------------------|-----------|--------------------------------|-----------------------------------------------------------------------------------------------------------------------------------------------------------------------------------------------------------------------------------------------------------------------------------------------------------------------------|
| N-terminal domain of CEACAM1, CEACAM3 and CEACAM5 | CC1/3/5-Sab        | -         | LeukoCom GmbH, Essen, Germany. |                                                                                                                                                                                                                                                                                                                             |
| A1B1 domain of CEACAM1                            | B3-17              | -         | LeukoCom GmbH, Essen, Germany. | <a href="https://www.kerafast.com/productgroup/860/ceacam1cd66a-antibodies">https://www.kerafast.com/productgroup/860/ceacam1cd66a-antibodies</a>                                                                                                                                                                           |
| A1B1 domain of CEACAM1                            | C5-1X              | -         | LeukoCom GmbH, Essen, Germany. | <a href="https://www.kerafast.com/productgroup/860/ceacam1cd66a-antibodies">https://www.kerafast.com/productgroup/860/ceacam1cd66a-antibodies</a>                                                                                                                                                                           |
| A1B1A2B2A3B3 domain of CEACAM5                    | 5C8C4              | -         | LeukoCom GmbH, Essen, Germany. | <a href="https://ximbio.com/reagent/153325/anti-ceacam5-cd66e-5c8c4-monoclonal-antibody">https://ximbio.com/reagent/153325/anti-ceacam5-cd66e-5c8c4-monoclonal-antibody</a>                                                                                                                                                 |
| Mouse IgG                                         | #R0480             | PE        | LeukoCom GmbH, Essen, Germany. | <a href="https://www.agilent.com/store/en_US/Prod-R048001-2/R048001-2?navAction=push&amp;catId=SubCat2ECS_146502&amp;pCatName=Secondary%20Antibody%20Conjugates">https://www.agilent.com/store/en_US/Prod-R048001-2/R048001-2?navAction=push&amp;catId=SubCat2ECS_146502&amp;pCatName=Secondary%20Antibody%20Conjugates</a> |
| Mouse IgG                                         | #1036-05           | HRP       | LeukoCom GmbH, Essen, Germany. | <a href="https://www.southernbiotech.com/?catno=1036-05&amp;type=Polyclonal#&amp;panel2-1">https://www.southernbiotech.com/?catno=1036-05&amp;type=Polyclonal#&amp;panel2-1</a>                                                                                                                                             |
| Rabbit IgG                                        | #AB_2632461        | PE        | LeukoCom GmbH, Essen, Germany. | <a href="https://www.jacksonimmuno.com/catalog/products/111-117-008/Goat-Rabbit-IgG-Fc-R-Phycoerythrin">https://www.jacksonimmuno.com/catalog/products/111-117-008/Goat-Rabbit-IgG-Fc-R-Phycoerythrin</a>                                                                                                                   |

|       |           |      |                                      |                                                                                                                                                                                                                           |
|-------|-----------|------|--------------------------------------|---------------------------------------------------------------------------------------------------------------------------------------------------------------------------------------------------------------------------|
| 6xHis | #AD1.1.10 | FITC | LeukoCom GmbH,<br>Essen,<br>Germany. | <a href="https://www.thermofisher.com/antibody/product/6x-His-Tag-Antibody-clone-AD1-1-10-Monoclonal/MA1-81891">https://www.thermofisher.com/antibody/product/6x-His-Tag-Antibody-clone-AD1-1-10-Monoclonal/MA1-81891</a> |
|-------|-----------|------|--------------------------------------|---------------------------------------------------------------------------------------------------------------------------------------------------------------------------------------------------------------------------|

**Appendix Table S8: Antibodies used in this study.**
